# Supplementary material for: Biosynthesis of fungal terpenoids
Source: Royal Society of Chemistry journal article supplement (doi:10.1039/d3np00052d), 2024-01-01
Supplement: d3np00052d1.pdf [file d3np00052d1.pdf]

## Electronic Supporting Information

### Biosynthesis of Fungal Terpenoids

Pan Luo,<sup>a\*</sup> Jia-Hua Huang,<sup>a\*</sup> Jian-Ming Lv,<sup>a</sup> Gao-Qian Wang,<sup>a</sup> Dan Hu<sup>a#</sup> and Hao Gao<sup>a#</sup>

<sup>a</sup> Institute of Traditional Chinese Medicine & Natural Products, College of Pharmacy / Guangdong Province Key Laboratory of Pharmacodynamic Constituents of TCM and New Drugs Research / International Cooperative Laboratory of Traditional Chinese Medicine Modernization and Innovative Drug Development of Chinese Ministry of Education of China, Jinan University, Guangzhou 510632, China.

## Table of contents

|                                                                    |    |
|--------------------------------------------------------------------|----|
| Supplementary Tables.....                                          | 3  |
| Table S1 Class I monoterpene cyclase in fungi.....                 | 3  |
| Table S2 Class I sesquiterpene cyclase in fungi.....               | 4  |
| Table S3 Class I diterpene cyclase in fungi.....                   | 10 |
| Table S4 Class I sesterterpene cyclase in fungi.....               | 12 |
| Table S5 Class I triterpene cyclase in fungi.....                  | 14 |
| Table S6 Class II diterpene cyclase in fungi.....                  | 15 |
| Table S7 Class II triterpene cyclase in fungi.....                 | 16 |
| Table S8 Class II sesquiterpene cyclase in fungi.....              | 17 |
| Table S9 UbiA-type sesquiterpene cyclase in fungi.....             | 18 |
| Table S10 UbiA-type diterpene cyclase in fungi.....                | 19 |
| Supplementary Figures.....                                         | 20 |
| Fig. S1 Structure of class I monoterpene cyclase products.....     | 20 |
| Fig. S2 Structure of class I sesquiterpene cyclase products.....   | 21 |
| Fig. S3 Structure of class I diterpene cyclase products.....       | 23 |
| Fig. S4 Structure of class I sesterterpene cyclase products.....   | 24 |
| Fig. S5 Structure of class I triterpene cyclase products.....      | 25 |
| Fig. S6 Structure of class II diterpene cyclase products.....      | 26 |
| Fig. S7 Structure of class II triterpene cyclase products.....     | 27 |
| Fig. S8 Structure of class II sesquiterpene cyclase products.....  | 28 |
| Fig. S9 Structure of UbiA-type sesquiterpene cyclase products..... | 29 |
| Fig. S10 Structure of UbiA-type diterpene cyclase products.....    | 30 |
| Supplementary References.....                                      | 31 |

## Supplementary Tables

**Table S1** Class I monoterpene cyclase in fungi

| No. | Cyclase name | Accession number | Strain               | Main product | Structural identification method | Reference |
|-----|--------------|------------------|----------------------|--------------|----------------------------------|-----------|
| 1   | Hyp3         | AHY23922         | <i>Hypoxyton</i> sp. | 1,8-cineole  | GC-MS, standard                  | 1         |

Cyclase information is available at the NCBI database website. <https://www.ncbi.nlm.nih.gov> (NCBI)

**Table S2** Class I sesquiterpene cyclase in fungi

| No. | Cyclase name | Accession number   | Strain                                       | Main product                    | Structural identification method | Reference |
|-----|--------------|--------------------|----------------------------------------------|---------------------------------|----------------------------------|-----------|
| 1   | Tri5         | AAD13657           | <i>Fusarium sporotrichioides</i>             | trichodiene                     | -                                | 2         |
| 2   | Ari1         | AAA33694           | <i>Penicillium roqueforti</i>                | (+)-aristolochene               | GC-MS, standard                  | 3         |
| 3   | AtARS        | AF198360           | <i>Aspergillus terreus</i>                   | (+)-aristolochene               | -                                | 4         |
| 4   | PeTS1        | KGO48192           | <i>Penicillium expansum</i>                  | (+)-aristolochene               | NMR                              | 5         |
| 5   | BcBOT2       | ATZ56107           | <i>Botrytis cinerea</i>                      | presilphiperfolan-8 $\beta$ -ol | NMR                              | 6         |
| 6   | Cop1         | EAU89322           | <i>Coprinus cinereus</i> 9/55                | germacrene A                    | GC-MS, standard                  | 7         |
| 7   | Cop2         | EAU85264           | <i>Coprinus cinereus</i> 9/55                | germacrene A                    | GC-MS, standard                  | 7         |
| 8   | Omp3         | 4636 (JGI)         | <i>Omphalotus olearius</i>                   | germacrene A                    | GC-MS, standard                  | 8         |
| 9   | Cop3         | A8NE23             | <i>Coprinus cinereus</i> 9/55                | $\alpha$ -muurolene             | GC-MS, standard                  | 7         |
| 10  | Omp1         | 1311 (JGI)         | <i>Omphalotus olearius</i>                   | $\alpha$ -muurolene             | GC-MS, standard                  | 8         |
| 11  | PpSTS01      | Posp11_60326 (JGI) | <i>Postia placenta</i> MAD-698               | $\alpha$ -muurolene             | GC-MS                            | 9         |
| 12  | CpSTS5       | LC436349 (DDBJ)    | <i>Clitopilus pseudo-pinsitus</i> ATCC 20527 | $\alpha$ -muurolene             | GC-MS                            | 10        |
| 13  | Agr3         | MN146026           | <i>Agrocybe aegerita</i> AAE-3               | $\alpha$ -muurolene             | GC-MS, standard                  | 11        |
| 14  | Cun0759      | -                  | <i>Cerrena unicolor</i>                      | $\alpha$ -muurolene             | GC-MS                            | 12        |
| 15  | Cop4         | A8NU13             | <i>Coprinus cinereus</i> 9/55                | $\delta$ -cadinene              | GC-MS, standard                  | 7         |
| 16  | Hyp2         | KJ433270           | <i>Hypoxylon</i> sp.                         | $\delta$ -cadinene              | GC-MS, standard                  | 1         |
| 17  | Omp4         | 1447 (JGI)         | <i>Omphalotus olearius</i>                   | $\delta$ -cadinene              | GC-MS, standard                  | 8         |
| 18  | Stehi128017  | EIM91001           | <i>Stereum hirsutum</i> FP-91666 SS1         | $\delta$ -cadinene              | GC-MS                            | 13        |
| 19  | PpSTS10      | Posp11_98072 (JGI) | <i>Postia placenta</i> MAD-698               | $\delta$ -cadinene              | GC-MS                            | 9         |
| 20  | Agr1         | MN146024           | <i>Agrocybe aegerita</i> AAE-3               | $\delta$ -cadinene              | GC-MS, standard                  | 11        |
| 21  | Agr4         | MN146027           | <i>Agrocybe aegerita</i> AAE-3               | $\delta$ -cadinene              | GC-MS, standard                  | 11        |
| 22  | CpSTS2       | LC436346 (DDBJ)    | <i>Clitopilus pseudo-pinsitus</i> ATCC 20527 | $\delta$ -cadinene              | GC-MS                            | 10        |
| 23  | ShSTS7       | 161672 (JGI)       | <i>Stereum hirsutum</i> FP-91666 SS1         | $\delta$ -cadinene              | GC-MS                            | 10        |
| 24  | ShSTS10      | 111121 (JGI)       | <i>Stereum hirsutum</i> FP-91666 SS1         | $\delta$ -cadinene              | GC-MS                            | 10        |
| 25  | ShSTS11      | 128017 (JGI)       | <i>Stereum hirsutum</i> FP-91666 SS1         | $\delta$ -cadinene              | GC-MS                            | 10        |
| 26  | Cun3158      | -                  | <i>Cerrena unicolor</i>                      | $\delta$ -cadinene              | GC-MS                            | 12        |

|    |                      |                     |                                              |                           |                 |    |
|----|----------------------|---------------------|----------------------------------------------|---------------------------|-----------------|----|
| 27 | Cop6                 | A8NCK5              | <i>Coprinus cinereus</i> 9/55                | $\alpha$ -cuprenene       | GC-MS, standard | 7  |
| 28 | Fompi1               | 84944 (JGI)         | <i>Fomitopsis pinicola</i> CS-1              | $\alpha$ -cuprenene       | GC-MS, standard | 8  |
| 29 | FgCLM1               | GU123140            | <i>Fusarium graminearum</i> 9F1              | longiborneol              | NMR             | 14 |
| 30 | FgJ01056             | PCD18636            | <i>Fusarium graminearum</i> J1-012           | longiborneol              | NMR             | 15 |
| 31 | Armgal               | AGR34199            | <i>Armillaria gallica</i> FU02472            | $\Delta^6$ -protoilludene | GC-MS, standard | 16 |
| 32 | Dia1                 | -                   | <i>Diaporthe</i> sp.                         | $\Delta^6$ -protoilludene | GC-MS           | 17 |
| 33 | Omp6                 | 4774 (JGI)          | <i>Omphalotus olearius</i>                   | $\Delta^6$ -protoilludene | GC-MS, standard | 8  |
| 34 | Omp7                 | 2271 (JGI)          | <i>Omphalotus olearius</i>                   | $\Delta^6$ -protoilludene | GC-MS, standard | 8  |
| 35 | Stehi25180           | P9WEW0              | <i>Stereum hirsutum</i> FP-91666 SS1         | $\Delta^6$ -protoilludene | GC-MS           | 13 |
| 36 | Stehi64702           | P9WEW1              | <i>Stereum hirsutum</i> FP-91666 SS1         | $\Delta^6$ -protoilludene | GC-MS           | 13 |
| 37 | Stehi73029           | P9WEW2              | <i>Stereum hirsutum</i> FP-91666 SS1         | $\Delta^6$ -protoilludene | GC-MS           | 13 |
| 38 | PpSTS08              | Pospl1_59374 (JGI)  | <i>Postia placenta</i> MAD-698               | $\Delta^6$ -protoilludene | NMR             | 9  |
| 39 | CpSTS4               | LC436348 (DDBJ)     | <i>Clitopilus pseudo-pinsitus</i> ATCC 20527 | $\Delta^6$ -protoilludene | GC-MS           | 10 |
| 40 | ShSTS15              | 64702 (JGI)         | <i>Stereum hirsutum</i> FP-91666 SS1         | $\Delta^6$ -protoilludene | GC-MS           | 10 |
| 41 | ShSTS16              | 73029 (JGI)         | <i>Stereum hirsutum</i> FP-91666 SS1         | $\Delta^6$ -protoilludene | GC-MS           | 10 |
| 42 | ShSTS17              | 69906 (JGI)         | <i>Stereum hirsutum</i> FP-91666 SS1         | $\Delta^6$ -protoilludene | GC-MS           | 10 |
| 43 | ShSTS18              | 25180 (JGI)         | <i>Stereum hirsutum</i> FP-91666 SS1         | $\Delta^6$ -protoilludene | GC-MS           | 10 |
| 44 | Agr6                 | MN146029            | <i>Agrocybe aegerita</i> AAE-3               | $\Delta^6$ -protoilludene | NMR             | 11 |
| 45 | Agr7                 | MN146030            | <i>Agrocybe aegerita</i> AAE-3               | $\Delta^6$ -protoilludene | NMR             | 11 |
| 46 | Denbi1_659367/DbPROS | Denbi1_659367 (JGI) | <i>Dendrothele bispora</i> CBS 962.96 v1.0   | $\Delta^6$ -protoilludene | GC-MS           | 11 |
| 47 | Hetan2_454193        | Hetan2_454193 (JGI) | <i>Heterobasidion annosum</i> v2.0           | $\Delta^6$ -protoilludene | GC-MS           | 11 |
| 48 | Hypsu1_138665        | Hypsu1_138665 (JGI) | <i>Hypoloma sublateritium</i> v1.0           | $\Delta^6$ -protoilludene | GC-MS           | 11 |
| 49 | Pro1                 | QJQ03973            | <i>Armillaria gallica</i> FU02472            | $\Delta^6$ -protoilludene | NMR             | 18 |
| 50 | Omp5a                | 2392 (JGI)          | <i>Omphalotus olearius</i>                   | $\gamma$ -cadinene        | GC-MS, standard | 8  |
| 51 | Omp5b                | 2393 (JGI)          | <i>Omphalotus olearius</i>                   | $\gamma$ -cadinene        | GC-MS, standard | 8  |
| 52 | PpSTS03              | Pospl1_99496 (JGI)  | <i>Postia placenta</i> MAD-698               | $\gamma$ -cadinene        | GC-MS           | 9  |
| 53 | CpSTS18              | LC436362 (DDBJ)     | <i>Clitopilus pseudo-pinsitus</i> ATCC 20527 | $\gamma$ -cadinene        | GC-MS           | 10 |
| 54 | ShSTS5               | 161672 (JGI)        | <i>Stereum hirsutum</i> FP-91666 SS1         | $\gamma$ -cadinene        | GC-MS           | 10 |

|    |              |                     |                                             |                                     |                 |    |
|----|--------------|---------------------|---------------------------------------------|-------------------------------------|-----------------|----|
| 55 | Pilcr_825684 | Pilcr_825684 (JGI)  | <i>Hypoloma sublateritium</i> v1.0          | $\gamma$ -cadinene                  | GC-MS           | 11 |
| 56 | Cun3817      | -                   | <i>Cerrena unicolor</i>                     | $\gamma$ -cadinene                  | GC-MS           | 12 |
| 57 | Omp9         | 3258 (JGI)          | <i>Omphalotus olearius</i>                  | $\alpha$ -barbatene                 | GC-MS           | 8  |
| 58 | Omp10        | 3981 (JGI)          | <i>Omphalotus olearius</i>                  | daucene                             | GC-MS, standard | 8  |
| 59 | Stehi159379  | EIM83755            | <i>Stereum hirsutum</i> FP-91666 SS1        | $\beta$ -barbatene                  | GC-MS           | 13 |
| 60 | ShSTS1       | 159379 (JGI)        | <i>Stereum hirsutum</i> FP-91666 SS1        | $\beta$ -barbatene                  | GC-MS           | 10 |
| 61 | Ffsc6        | HF563561            | <i>Fusarium fujikuroi</i> IMI58289          | (-)- $\alpha$ -acorenol             | NMR             | 19 |
| 62 | Ffsc4        | HF563560            | <i>Fusarium fujikuroi</i> IMI58289          | koraiol                             | NMR             | 19 |
| 63 | FgJ09920     | KAF5245951          | <i>Fusarium graminearum</i> J1-012          | koraiol                             | NMR             | 15 |
| 64 | Cgl02525     | NMDCN0000QHS (NMDC) | <i>Colletotrichum gloeosporioides</i> ES026 | koraiol                             | GC-MS           | 20 |
| 65 | Hyp5         | KJ433273            | <i>Hypoxyton</i> sp.                        | Unknown, $\alpha$ -bulnesene        | GC-MS           | 1  |
| 66 | STC3         | S0DX56              | <i>Fusarium fujikuroi</i>                   | eremophilene                        | NMR             | 21 |
| 67 | STC5         | S0ENM8              | <i>Fusarium fujikuroi</i>                   | guaia-6,10(14)-diene                | NMR             | 21 |
| 68 | FgJ02895     | NMDCN0000QH6 (NMDC) | <i>Fusarium graminearum</i> J1-012          | guaia-6,10(14)-diene                | NMR             | 20 |
| 69 | EC12-GS      | 315006 (JGI)        | <i>Daldinia eschscholzii</i> EC12           | $\tau$ -gurjunene                   | GC-MS           | 22 |
| 70 | EC38-GPS     | 80361 (JGI)         | <i>Hypoxyton</i> sp. EC38                   | $\tau$ -gurjunene                   | GC-MS           | 22 |
| 71 | EC12-SS      | 24646 (JGI)         | <i>Daldinia eschscholzii</i> EC12           | $\alpha$ -selinene                  | GC-MS           | 22 |
| 72 | EC12-ILS     | 70183 (JGI)         | <i>Daldinia eschscholzii</i> EC12           | isolekene                           | GC-MS           | 22 |
| 73 | CI4A-CPS     | 322581 (JGI)        | <i>Hypoxyton</i> sp. CI4A                   | $\beta$ -chamigrene                 | GC-MS           | 22 |
| 74 | CO27-CPS     | 392541 (JGI)        | <i>Hypoxyton</i> sp. CO27                   | $\beta$ -chamigrene                 | GC-MS           | 22 |
| 75 | EC38-CPS     | 328361 (JGI)        | <i>Hypoxyton</i> sp. EC38                   | $\beta$ -chamigrene                 | GC-MS           | 22 |
| 76 | CI4A-CS      | 6706 (JGI)          | <i>Hypoxyton</i> sp. CI4A                   | caryophyllene-(II)                  | GC-MS           | 22 |
| 77 | CO27-CS      | 397991 (JGI)        | <i>Hypoxyton</i> sp. CO27                   | caryophyllene-(II)                  | GC-MS           | 22 |
| 78 | EC38-CS      | 373976 (JGI)        | <i>Hypoxyton</i> sp. EC38                   | caryophyllene-(II)                  | GC-MS           | 22 |
| 79 | BvCS         | KU668561            | <i>Boreostereum vibrans</i>                 | (+)-torreyol/(+)- $\delta$ -cadinol | GC-MS, standard | 23 |
| 80 | GME3638      | KX281944            | <i>Lignosus rhinocerotis</i> TM02           | (+)-torreyol/(+)- $\delta$ -cadinol | NMR             | 24 |
| 81 | Copu5        | XP_007765330        | <i>Coniophora puteana</i>                   | (+)-torreyol/(+)- $\delta$ -cadinol | NMR             | 25 |
| 82 | Copu9        | XP_007765560        | <i>Coniophora puteana</i>                   | (+)-torreyol/(+)- $\delta$ -cadinol | NMR             | 25 |
| 83 | STC1         | XM_023573743        | <i>Fusarium fujikuroi</i> IMI58289          | (-)-germacrene D                    | NMR             | 26 |

|     |          |                     |                                              |                                                                 |                 |    |
|-----|----------|---------------------|----------------------------------------------|-----------------------------------------------------------------|-----------------|----|
| 84  | AcTPS1   | KFH47455            | <i>Acremonium chrysogenum</i> ATCC 11550     | (-)-germacrene D                                                | NMR             | 27 |
| 85  | GME3634  | KX281943            | <i>Lignosus rhinocerotis</i> TM02            | $\alpha$ -cadinol                                               | NMR             | 24 |
| 86  | GME9210  | KX281945            | <i>Lignosus rhinocerotis</i> TM02            | 1,3,4,5,6,7-hexahydro-2,5,5-trimethyl-2H-2,4a-ethanonaphthalene | GC-MS           | 24 |
| 87  | AcTPS4   | -                   | <i>Antrodia cinnamomea</i>                   | zonarene                                                        | GC-MS           | 28 |
| 88  | AcTPS5   | -                   | <i>Antrodia cinnamomea</i>                   | T-cadinol                                                       | GC-MS, standard | 28 |
| 89  | AcTPS9   | -                   | <i>Antrodia cinnamomea</i>                   | 1- <i>epi</i> -cubenol                                          | GC-MS           | 28 |
| 90  | ShSTS8   | 146390 (JGI)        | <i>Stereum hirsutum</i> FP-91666 SS1         | 1- <i>epi</i> -cubenol                                          | GC-MS           | 10 |
| 91  | Copu2    | XP_007771895        | <i>Coniophora puteana</i>                    | $\beta$ -copaene                                                | NMR             | 29 |
| 92  | Copu3    | XP_007765978        | <i>Coniophora puteana</i>                    | cubebol                                                         | NMR             | 29 |
| 93  | AcCop4   | -                   | <i>Antrodia cinnamomea</i>                   | cubebol                                                         | NMR             | 30 |
| 94  | AstA     | XP_001213594        | <i>Aspergillus terreus</i>                   | (-)-daucane                                                     | NMR             | 31 |
| 95  | STC4     | -                   | <i>Termitomyces</i> sp.                      | (+)-intermedeol                                                 | NMR             | 32 |
| 96  | STC9     | KNZ74377            | <i>Termitomyces</i> sp.                      | (-)- $\gamma$ -cadinene                                         | NMR             | 32 |
| 97  | GsSTS43  | OK500006            | <i>Ganoderma sinensis</i>                    | (-)- $\gamma$ -cadinene                                         | GC-MS, standard | 33 |
| 98  | GsSTS45b | OK500007            | <i>Ganoderma sinensis</i>                    | (-)- $\gamma$ -cadinene                                         | GC-MS, standard | 33 |
| 99  | GISTS6   | OK500005            | <i>Ganoderma lucidum</i>                     | (-)- $\gamma$ -cadinene                                         | GC-MS, standard | 33 |
| 100 | STC15    | KAG5727529          | <i>Termitomyces</i> sp.                      | (+)-germacrene D-4-ol                                           | NMR             | 32 |
| 101 | FgFS     | ESU09719            | <i>Fusarium graminearum</i>                  | fusariumdiene, fusagramineol, <i>epi</i> -fusagramineol         | NMR             | 34 |
| 102 | PeniA    | QDO73502            | <i>Penicillium griseofulvum</i> NRRL35584    | silphinene                                                      | NMR             | 35 |
| 103 | AspeG    | -                   | <i>Aspergillus aculeatus</i> CRI323-04       | silphinene                                                      | NMR             | 36 |
| 104 | TaTS     | LC484924            | <i>Trichoderma</i> sp.                       | trichobrasilenol                                                | NMR             | 37 |
| 105 | BraA     | P9WER0              | <i>Annulohyphoxylon truncatum</i>            | trichobrasilenol                                                | NMR             | 38 |
| 106 | Tvi09626 | NMDCN0000Q18 (NMDC) | <i>Trichoderma viride</i> J1-030             | brasilanol                                                      | NMR             | 39 |
| 107 | AneC     | A0A1L9WUI2          | <i>Aspergillus aculeatus</i> ATCC16872       | dauca-4,7-diene                                                 | NMR             | 40 |
| 108 | FlvE     | QRD86578            | <i>Aspergillus flavus</i>                    | acoradiene                                                      | NMR             | 41 |
| 109 | Agr2     | MN146025            | <i>Agrocybe aegerita</i> AAE-3               | viridiflorene/ledene                                            | GC-MS, standard | 11 |
| 110 | CpSTS13  | LC436357 (DDBJ)     | <i>Clitopilus pseudo-pinsitus</i> ATCC 20527 | viridiflorene/ledene                                            | GC-MS           | 10 |

|     |               |                     |                                              |                          |                 |    |
|-----|---------------|---------------------|----------------------------------------------|--------------------------|-----------------|----|
| 111 | CpSTS9        | LC436353 (DDBJ)     | <i>Clitopilus pseudo-pinsitus</i> ATCC 20527 | viridiflorol             | GC-MS           | 10 |
| 112 | CpSTS12       | LC436356 (DDBJ)     | <i>Clitopilus pseudo-pinsitus</i> ATCC 20527 | viridiflorol             | GC-MS           | 10 |
| 113 | Agr5          | MN146028            | <i>Agrocybe aegerita</i> AAE-3               | viridiflorol             | GC-MS, standard | 11 |
| 114 | Denbi1_816208 | Denbi1_816208 (JGI) | <i>Dendrothele bispora</i> CBS 962.96 v1.0   | viridiflorol             | GC-MS           | 11 |
| 115 | Sphst_47084   | Sphst_47084 (JGI)   | <i>Sphaerobolus stellatus</i> v1.0           | viridiflorol             | GC-MS           | 11 |
| 116 | Agr8          | MN146031            | <i>Agrocybe aegerita</i> AAE-3               | $\gamma$ -muurolene      | GC-MS, standard | 11 |
| 117 | Agr9          | MN146032            | <i>Agrocybe aegerita</i> AAE-3               | $\gamma$ -muurolene      | GC-MS, standard | 11 |
| 118 | Cun3157       | -                   | <i>Cerrena unicolor</i>                      | $\beta$ -cubebene        | GC-MS           | 12 |
| 119 | FgJ04421      | NMDCN0000QH (NMDC)  | <i>Fusarium graminearum</i> J1-012           | $\beta$ -cubebene        | GC-MS           | 20 |
| 120 | Cun3574       | -                   | <i>Cerrena unicolor</i>                      | $\alpha$ -copaene        | GC-MS           | 12 |
| 121 | Cun5155       | -                   | <i>Cerrena unicolor</i>                      | aromadendrene            | GC-MS, standard | 12 |
| 122 | Cun0773       | -                   | <i>Cerrena unicolor</i>                      | germacrene D             | GC-MS           | 12 |
| 123 | PpSTS06       | Posp11_45581 (JGI)  | <i>Postia placenta</i> MAD-698               | $\alpha$ -gurjunene      | GC-MS           | 9  |
| 124 | PpSTS14       | Posp11_101549 (JGI) | <i>Postia placenta</i> MAD-698               | pentalenene              | GC-MS           | 9  |
| 125 | CpSTS6        | LC436350 (DDBJ)     | <i>Clitopilus pseudo-pinsitus</i> ATCC 20527 | pentalenene              | GC-MS           | 10 |
| 126 | CpSTS1        | LC436345 (DDBJ)     | <i>Clitopilus pseudo-pinsitus</i> ATCC 20527 | sterpurene               | NMR             | 10 |
| 127 | CpSTS8        | LC436352 (DDBJ)     | <i>Clitopilus pseudo-pinsitus</i> ATCC 20527 | alloaromadendrene        | GC-MS           | 10 |
| 128 | CpSTS11       | LC436355 (DDBJ)     | <i>Clitopilus pseudo-pinsitus</i> ATCC 20527 | 9-alloaromadendrene      | NMR             | 10 |
| 129 | CpSTS16       | LC436360 (DDBJ)     | <i>Clitopilus pseudo-pinsitus</i> ATCC 20527 | aristolene               | GC-MS           | 10 |
| 130 | CpSTS17       | LC436361 (DDBJ)     | <i>Clitopilus pseudo-pinsitus</i> ATCC 20527 | $\beta$ -caryophyllene   | GC-MS           | 10 |
| 131 | ShSTS13       | 50042 (JGI)         | <i>Stereum hirsutum</i> FP-91666 SS1         | $\beta$ -caryophyllene   | GC-MS           | 10 |
| 132 | ShSTS4        | 52743 (JGI)         | <i>Stereum hirsutum</i> FP-91666 SS1         | hirsutene                | GC-MS           | 10 |
| 133 | ShSTS12       | 111127 (JGI)        | <i>Stereum hirsutum</i> FP-91666 SS1         | $\alpha$ -cubebene       | GC-MS           | 10 |
| 134 | Galma_104215  | Galma_104215 (JGI)  | <i>Galerina marginata</i> v1.0               | $\beta$ -gurjunene       | GC-MS           | 11 |
| 135 | CpSTS3        | LC436347 (DDBJ)     | <i>Clitopilus pseudo-pinsitus</i> ATCC 20527 | $\delta$ -cadinol        | GC-MS           | 10 |
| 136 | Cun7050       | -                   | <i>Cerrena unicolor</i>                      | $\delta$ -cadinol        | GC-MS           | 12 |
| 137 | Cun0716       | -                   | <i>Cerrena unicolor</i>                      | $\delta$ -cadinol        | GC-MS           | 12 |
| 138 | ThmB          | ULE36148            | <i>Aspergillus fischeri</i> ATCC 18618       | (-)-amorpho-4,11-diene   | NMR             | 42 |
| 139 | BcBOS         | XP_001546971        | <i>Botrytis cinerea</i> B05.10               | (+)- $\alpha$ -bisabolol | NMR             | 43 |



|     |                |                     |                                             |                                              |                 |    |
|-----|----------------|---------------------|---------------------------------------------|----------------------------------------------|-----------------|----|
| 140 | LsBERS         | TVY81921            | <i>Lachnellula suecica</i>                  | (+)- $\alpha$ -bisabolol                     | NMR             | 43 |
| 141 | NsBERS         | MZ672113            | <i>Nectria</i> sp. HLS206                   | (+)- $\alpha$ - <i>trans</i> -bergamotene    | NMR             | 43 |
| 142 | NsTAS          | MZ672113            | <i>Neonectria</i> sp. DH2                   | trichoacorenol                               | NMR             | 43 |
| 143 | AaT08897/AaTPS | NMDCN0000QH2 (NMDC) | <i>Alternaria alternata</i> TPF6            | 7- <i>epi</i> - $\alpha$ -selinene           | NMR             | 20 |
| 144 | Cgl13309       | NMDCN0000QJA (NMDC) | <i>Colletotrichum gloeosporioides</i> ES026 | (-)-aristolene                               | NMR             | 20 |
| 145 | IIIS           | -                   | <i>Irpex lacteus</i>                        | iltremulanol A                               | NMR, X-ray      | 44 |
| 146 | SptA           | WFJ08646            | <i>Spiromastix</i> sp. MCCC 3A00308         | guaia-1,5(6)-diene                           | NMR             | 45 |
| 147 | GdlS           | OP095378            | <i>Aspergillus ustus</i> 3.3904             | germacradienol                               | NMR             | 46 |
| 148 | PeTS4          | XP_016598880        | <i>Penicillium expansum</i>                 | (+)-bicyclogermacrene                        | NMR             | 5  |
| 149 | LdSTS7         | -                   | <i>Lactarius deliciosus</i>                 | 1, 9-aristolene, 1-aristolene                | NMR             | 47 |
| 150 | LdSTS11        | -                   | <i>Lactarius deliciosus</i>                 | 1, 9-aristolene, 1-aristolene                | NMR             | 47 |
| 151 | AsR6           | AWM95795            | <i>Acremonium strictum</i> IMI 501407       | 2 <i>E</i> ,6 <i>E</i> ,9 <i>E</i> -humulene | NMR             | 48 |
| 152 | PycR6          | WHP53403            | <i>Leptobacillium</i> sp. CF-236968         | 2 <i>E</i> ,6 <i>E</i> ,9 <i>E</i> -humulene | NMR             | 49 |
| 153 | EupR3          | WHS04494            | <i>Phaeosphaeriaceae</i> sp. CF-150626      | 2 <i>Z</i> ,6 <i>E</i> ,9 <i>E</i> -humulene | NMR             | 49 |
| 154 | EupE           | QCO93112            | <i>Phoma</i> sp. CGMCC 10481                | 2 <i>Z</i> ,6 <i>E</i> ,9 <i>E</i> -humulene | GC-MS, standard | 50 |
| 155 | EupfG          | -                   | <i>Penicillium janthinellum</i>             | 2 <i>Z</i> ,6 <i>E</i> ,9 <i>E</i> -humulene | GC-MS           | 51 |
| 156 | BcABA3         | XP_024550392        | <i>Botrytis cinerea</i> MAFF 306914         | $\alpha$ -ionylideneethane                   | NMR             | 52 |

Cyclase information is available at the following database websites, and the unlabeled cyclase accession numbers above are NCBI database sources.

<https://www.ncbi.nlm.nih.gov> (NCBI), <https://img.jgi.doe.gov/> (JGI), <https://nmcdc.cn/en> (NMDC), <https://www.ddbj.nig.ac.jp> (DDBJ)

**Table S3** Class I diterpene cyclase in fungi

| No. | Cyclase name | Accession number    | Strain                                      | Main product              | Structural identification method | Reference |
|-----|--------------|---------------------|---------------------------------------------|---------------------------|----------------------------------|-----------|
| 1   | PaFS         | AB267396            | <i>Phomopsis amygdali</i> N2                | fusicocca-2,10(14)-diene  | NMR                              | 53        |
| 2   | AbFS         | C9K2Q3              | <i>Alternaria brassicicola</i> ATCC 96836   | fusicocca-2,10(14)-diene  | GC-MS                            | 54        |
| 3   | BscA         | XP_007924161        | <i>Pseudocercospora fijiensis</i>           | fusicocca-2,10(14)-diene  | NMR                              | 55        |
| 4   | PgFS         | MW798217            | <i>Pyricularia grisea</i>                   | fusicocca-2,10(14)-diene  | NMR                              | 56        |
| 5   | PaPS         | AB252833            | <i>Phomopsis amygdali</i> N2                | phomopsene                | NMR                              | 57        |
| 6   | SdnA         | A0A1B4XBG5          | <i>Sordaria araneosa</i> Cain ATCC 36386    | cycloaraneosene           | NMR                              | 58        |
| 7   | Tvi11551     | -                   | <i>Trichoderma viride</i> J1-030            | cycloaraneosene           | GC-MS                            | 20        |
| 8   | EvVS         | LC063849 (DDBJ)     | <i>Emericella varicolor</i> NBRC 32302      | variediene                | NMR                              | 59        |
| 9   | FgGS         | KY462790            | <i>Fusarium graminearum</i> J1-012          | variediene                | NMR                              | 60        |
| 10  | AbVS         | OJJ72250            | <i>Aspergillus brasiliensis</i> CBS 101.740 | variediene                | NMR                              | 61        |
| 11  | SmVS         | MW798207            | <i>Sordaria macrospora</i>                  | variediene                | NMR                              | 56        |
| 12  | BpVS         | MW798228            | <i>Baudoinia panamericana</i>               | variediene                | NMR                              | 56        |
| 13  | AbVS'        | MW798217            | <i>Aspergillus brasiliensis</i>             | variediene                | NMR                              | 56        |
| 14  | AaGS         | MW798231            | <i>Aspergillus aculeatus</i>                | variediene                | NMR                              | 56        |
| 15  | CgDS         | P9WEV7              | <i>Colletotrichum gloeosporioides</i> ES026 | dolasta-1(15),8-diene     | NMR                              | 62        |
| 16  | Cgl13742     | NMDCN0000QI3 (NMDC) | <i>Colletotrichum gloeosporioides</i> ES026 | dolasta-1(15),8-diene     | GC-MS                            | 20        |
| 17  | PcCS         | LC411963 (DDBJ)     | <i>Penicillium chrysogenum</i> MT-12        | deoxyconidiogenol         | NMR                              | 63        |
| 18  | PchDS        | LC373222 (DDBJ)     | <i>Penicillium chrysogenum</i> MAFF111241   | deoxyconidiogenol         | NMR                              | 64        |
| 19  | PrDS         | CDM32996            | <i>Penicillium roqueforti</i> IFM48062      | deoxyconidiogenol         | NMR                              | 64        |
| 20  | PhPS         | MW798224            | <i>Pseudovirgaria hyperparasitica</i>       | deoxyconidiogenol         | NMR                              | 56        |
| 21  | PaCS         | MW798233            | <i>Penicillium arizonense</i>               | deoxyconidiogenol         | NMR                              | 56        |
| 22  | SteTC1       | XP_007305993        | <i>Stereum histurum</i>                     | (-)- <i>R</i> -nephthenol | NMR                              | 65        |
| 23  | MgMS         | MN413676            | <i>Myrothecium gramineum</i> ZLW0801-19     | myrothec-15(17)-en-7-ol   | NMR                              | 66        |
| 24  | AcSS         | MW798205            | <i>Aspergillus calidoustus</i>              | spiroviolene              | NMR                              | 56        |
| 25  | AaT09930     | NMDCN0000QH3 (NMDC) | <i>Alternaria alternata</i> TPF6            | traversiadiene            | NMR                              | 20        |
| 26  | TndC         | QVR97762            | <i>Aspergillus flavipes</i> CNL-338         | talarodiene               | NMR                              | 67        |

|    |      |          |                                          |                      |     |    |
|----|------|----------|------------------------------------------|----------------------|-----|----|
| 27 | TadA | ON624151 | <i>Talaromyces wortmannii</i> ATCC 26942 | talaro-7,13-diene    | NMR | 68 |
| 28 | PsaD | OR221158 | <i>Psathyrella candolleana</i>           | guanacasta-1,3-diene | NMR | 69 |

---

Cyclase information is available at the following database websites, and the unlabeled cyclase accession numbers above are NCBI database sources.  
<https://www.ncbi.nlm.nih.gov> (NCBI), <https://nmhc.cn/en> (NMDC), <https://www.ddbj.nig.ac.jp> (DDBJ)

**Table S4** Class I sesterterpene cyclase in fungi

| No. | Cyclase name       | Accession number    | Strain                                      | Main product           | Structural identification method | Reference |
|-----|--------------------|---------------------|---------------------------------------------|------------------------|----------------------------------|-----------|
| 1   | AcOS               | ACLA_076850         | <i>Aspergillus clavatus</i> NRRL 1          | ophiobolin F           | NMR, X-ray                       | 70        |
| 2   | AuOS               | MW798208            | <i>Aspergillus ustus</i>                    | ophiobolin F           | NMR                              | 56        |
| 3   | BmOS               | MW798226            | <i>Bipolaris maydis</i>                     | ophiobolin F           | NMR                              | 56        |
| 4   | EvSS               | LC073704 (DDBJ)     | <i>Emericella variegata</i> NBRC 32302      | stellata-2,6,19-triene | NMR                              | 71        |
| 5   | NfSS               | EAW16201            | <i>Neosartorya fischeri</i>                 | sesterfisherol         | NMR                              | 72        |
| 6   | AaTPS1             | XP_018386201        | <i>Alternaria alternata</i> MB-30           | sesterfisherol         | NMR                              | 73        |
| 7   | AaSS               | MW798204            | <i>Alternaria alternata</i>                 | sesterfisherol         | NMR                              | 56        |
| 8   | EvAS               | LC113889 (DDBJ)     | <i>Emericella variegata</i> NBRC 32302      | astellifadiene         | NMR, crystalline sponge method   | 74        |
| 9   | EvQS               | LC155210 (DDBJ)     | <i>Emericella variegata</i> NBRC 32302      | quiannulatene          | NMR                              | 75        |
| 10  | FgMS               | KY462789            | <i>Fusarium graminearum</i> J1-012          | mangicdiene            | NMR                              | 60        |
| 11  | PbSS               | LC228601 (DDBJ)     | <i>Penicillium brasilianum</i> NBRC 6234    | sesterbrasiliatriene   | NMR                              | 76        |
| 12  | PaSS               | MW798222            | <i>Penicillium arizonense</i>               | sesterbrasiliatriene   | NMR                              | 56        |
| 13  | PvPS               | LC228602 (DDBJ)     | <i>Penicillium verrucosum</i> TPU1311       | preasperterpenoid A    | NMR                              | 76        |
| 14  | AstC               | A0A3Q9FFM1          | <i>Talaromyces wortmannii</i> ATCC 26942    | preasperterpenoid A    | NMR                              | 77        |
| 15  | TtPS               | MW798214            | <i>Thermothielavioides terrestris</i>       | preasperterpenoid A    | NMR                              | 56        |
| 16  | TvPS               | MW798225            | <i>Talaromyces verrucosus</i>               | preasperterpenoid A    | NMR                              | 56        |
| 17  | BmTS1              | ENH98917            | <i>Bipolaris maydis</i> ATCC48331           | Bm1                    | NMR                              | 78        |
| 18  | BmTS2              | ENI07344            | <i>Bipolaris maydis</i> ATCC48331           | Bm2                    | NMR                              | 78        |
| 19  | PbTS1              | LC274619 (DDBJ)     | <i>Phoma betae</i> PS-13                    | Pb1                    | NMR                              | 78        |
| 20  | BtcA <sub>co</sub> | N4V6D4.1            | <i>Colletotrichum orbiculare</i>            | Pb1                    | NMR                              | 79        |
| 21  | CoFS               | MW798210            | <i>Colletotrichum orbiculare</i>            | Pb1                    | NMR                              | 56        |
| 22  | ChPS               | MW798213            | <i>Colletotrichum higginsianum</i>          | Pb1                    | NMR                              | 56        |
| 23  | CsPS               | MW798219            | <i>Colletotrichum siamense</i>              | Pb1                    | NMR                              | 56        |
| 24  | Cgl05950           | NMDCN0000QHU (NMDC) | <i>Colletotrichum gloeosporioides</i> ES026 | Pb1                    | GC-MS                            | 20        |
| 25  | BmTS3              | ENH99278            | <i>Bipolaris maydis</i> ATCC48331           | Bm3                    | NMR                              | 78        |
| 26  | BsPS               | KAF5853325          | <i>Bipolaris sorokiniana</i> BS11134        | Bm3                    | NMR                              | 80        |
| 27  | CfBS               | MW798209            | <i>Colletotrichum fioriniae</i>             | Bm3                    | NMR                              | 56        |

|    |        |              |                                          |                                 |       |    |
|----|--------|--------------|------------------------------------------|---------------------------------|-------|----|
| 28 | MpBS   | MW798229     | <i>Macrophomina phaseolina</i>           | Bm3                             | NMR   | 56 |
| 29 | AcIdAS | CEL06489     | <i>Aspergillus calidoustus</i> CBS121601 | asperterpenol A                 | NMR   | 81 |
| 30 | AuAS   | MW387950     | <i>Aspergillus ustus</i> 094102          | aspergildiene A–D               | NMR   | 82 |
| 31 | AcAS   | CEN61919     | <i>Aspergillus calidoustus</i>           | aspergildiene A–D, calidoustene | NMR   | 83 |
| 32 | AtAS   | ATEG_03568   | <i>Aspergillus terreus</i> NIH 2624      | preaspterpenacid I              | NMR   | 84 |
| 33 | FoFS   | MW446505     | <i>Fusarium oxysporum</i> FO14005        | fusoxypene A                    | NMR   | 84 |
| 34 | ZbSS   | MW798202     | <i>Zymoseptoria brevis</i>               | sesterovisene                   | NMR   | 56 |
| 35 | CiSS   | MW798201     | <i>Colletotrichum incanum</i>            | sesterorbiculene                | NMR   | 56 |
| 36 | CoSS   | MW798211     | <i>Colletotrichum orbiculare</i>         | sesterorbiculene                | NMR   | 56 |
| 37 | CgSS   | MW798218     | <i>Colletotrichum gloeosporioides</i>    | sesterorbiculene                | NMR   | 56 |
| 38 | PfVS   | MW798216     | <i>Pestalotiopsis fici</i>               | variculatriene A                | GC-MS | 56 |
| 39 | ChVS   | MW798212     | <i>Colletotrichum higginsianum</i>       | (–)-variculatriene B            | NMR   | 56 |
| 40 | PoVS   | MW798215     | <i>Pyricularia oryzae</i>                | (–)-variculatriene B            | NMR   | 56 |
| 41 | LmVS   | MW798221     | <i>Lophiostoma macrostomum</i>           | (–)-variculatriene B            | NMR   | 56 |
| 42 | CsVS   | MW798223     | <i>Colletotrichum sublineola</i>         | (–)-variculatriene B            | NMR   | 56 |
| 43 | PoVS   | MW798227     | <i>Pyricularia oryzae</i>                | (–)-variculatriene B            | NMR   | 56 |
| 44 | ChBS   | MW798232     | <i>Colletotrichum higginsianum</i>       | brassitetraene A                | GC-MS | 56 |
| 45 | CsSS   | MW685620     | <i>Cytospora schulzeri</i> 12565         | schultriene                     | NMR   | 85 |
| 46 | NnNS   | MW685621     | <i>Nectria nigrescens</i> 12199          | nigtetraene                     | NMR   | 85 |
| 47 | PstA   | -            | <i>Penicillium herquei</i> TJ403-A1      | penisentene                     | NMR   | 86 |
| 48 | AaTPS2 | XP_018380014 | <i>Alternaria alternata</i> MB-30        | preterpestacin I                | NMR   | 73 |
| 49 | VrcA   | XP_020054773 | <i>Aspergillus aculeatus</i> ATCC 16872  | variecoladiene                  | NMR   | 87 |

Cyclase information is available at the following database websites, and the unlabeled cyclase accession numbers above are NCBI database sources.

<https://www.ncbi.nlm.nih.gov> (NCBI), <https://nmdc.cn/en> (NMDC), <https://www.ddbj.nig.ac.jp> (DDBJ)

**Table S5** Class I triterpene cyclase in fungi

| No. | Cyclase name | Accession number | Strain                                      | Main product   | Structural identification method | Reference |
|-----|--------------|------------------|---------------------------------------------|----------------|----------------------------------|-----------|
| 1   | TvTS         | P9WER5           | <i>Talaromyces verruculosus</i> TS63-9      | talaropentaene | NMR                              | 88        |
| 2   | MpMS         | K2SUY0           | <i>Macrophomina phaseolina</i> MS6          | macrophomene   | NMR                              | 88        |
| 3   | CgCS         | 7WIJ_A           | <i>Colletotrichum gloeosporioides</i> ES026 | colleterpenol  | NMR                              | 88        |

Cyclase information is available at the NCBI database website. <https://www.ncbi.nlm.nih.gov> (NCBI)

**Table S6** Class II diterpene cyclase in fungi

| No. | Cyclase name     | Accession number | Strain                                      | Main product                       | Structural identification method | Reference |
|-----|------------------|------------------|---------------------------------------------|------------------------------------|----------------------------------|-----------|
| 1   | FCPS/KS          | AB003395         | <i>Phaeosphaeria</i> sp. L487               | <i>ent</i> -kaurene                | GC-MS                            | 89        |
| 2   | GCPS/KS          | BAA84917         | <i>Gibberella fujikuroi</i> IFO30336        | <i>ent</i> -kaurene                | GC-MS                            | 90        |
| 3   | CPS              | Y15013           | <i>Gibberella fujikuroi</i> m567            | copalyl diphosphate                | -                                | 91        |
| 4   | PaDC2            | AB252835         | <i>Phomopsis amygdali</i> N2                | copalyl diphosphate                | NMR                              | 92        |
| 5   | PvCPS            | LC316181 (DDBJ)  | <i>Penicillium verruculosum</i> TPU1311     | copalyl diphosphate                | NMR                              | 93        |
| 6   | PfCPS            | 403578 (JGI)     | <i>Penicillium fellutanum</i> ATCC 48694    | copalyl diphosphate                | NMR                              | 93        |
| 7   | PbACS            | AB049075         | <i>Phoma betae</i> PS-13                    | aphidicolan-16 $\beta$ -ol         | MS, standard                     | 94        |
| 8   | PaDC1            | AB252834         | <i>Phomopsis amygdali</i> F6                | phyllocladan-16 $\alpha$ -ol       | NMR                              | 92        |
| 9   | AN1594           | A0A1U8QHE3       | <i>Aspergillus nidulans</i> FGSC A4         | <i>ent</i> -pimara-8(14),15-diene  | GC-MS, standard                  | 95        |
| 10  | AfCPS-PS         | XP_753151        | <i>Aspergillus fumigatus</i> AF293          | isopimara-7,15-diene               | GC-MS, standard                  | 96        |
| 11  | AoCPS-PS         | XP_001820661     | <i>Aspergillus oryzae</i> RIB40             | isopimara-7,15-diene               | GC-MS, standard                  | 96        |
| 12  | AnCPS-PS         | XP_001398730     | <i>Aspergillus niger</i> CBS 513.88         | sandaracopimaradiene               | GC-MS, standard                  | 96        |
| 13  | NfCPS-PS         | XP_001264196     | <i>Neosartorya fischeri</i> NRRL 181        | sandaracopimaradiene               | GC-MS, standard                  | 96        |
| 14  | Ple3/CpPS/Pl-cyc | MG764077         | <i>Clitopilus passeckerianus</i> ATCC 34646 | premutilin                         | NMR                              | 97        |
| 15  | PunTC            | XP_007383173     | <i>Punctularia strigosozonata</i>           | <i>ent</i> -kauran-16 $\alpha$ -ol | NMR                              | 65        |
| 16  | SerTC            | XP_007315031     | <i>Serpula lacrymans</i>                    | <i>ent</i> -kauran-16 $\alpha$ -ol | NMR                              | 65        |

Cyclase information is available at the following database websites, and the unlabeled cyclase accession numbers above are NCBI database sources.

<https://www.ncbi.nlm.nih.gov> (NCBI), <https://img.jgi.doe.gov/> (JGI), <https://www.ddbj.nig.ac.jp> (DDBJ)

**Table S7** Class II triterpene cyclase in fungi

| No. | Cyclase name | Accession number | Strain                                   | Main product                           | Structural identification method | Reference |
|-----|--------------|------------------|------------------------------------------|----------------------------------------|----------------------------------|-----------|
| 1   | Erg7         | NP_011939        | <i>Saccharomyces cerevisiae</i>          | lanosterol                             | TLC, standard                    | 98, 99    |
| 2   | Gl-LS        | GQ169529         | <i>Ganoderma lucidum</i>                 | lanosterol                             | -                                | 100       |
| 3   | AcOSC        | AIO10969         | <i>Antrodia cinnamomea</i> WSY-01        | lanosterol                             | GC-MS, standard                  | 101       |
| 4   | HelA         | Q4WR16           | <i>Aspergillus fumigatus</i> Af293       | protosta-17(20)Z,24-dien-3 $\beta$ -ol | NMR                              | 102       |
| 5   | CfaOSC2      | MF972287         | <i>Cordyceps farinosa</i> KMCC47486      | protosta-17(20)Z,24-dien-3 $\beta$ -ol | GC-MS                            | 103       |
| 6   | FusA         | QBB00671         | <i>Acremonium fusidioides</i> ATCC 14700 | protosta-17(20)Z,24-dien-3 $\beta$ -ol | NMR                              | 104       |
| 7   | CepA         | KFH43040         | <i>Acremonium chrysogenum</i> ATCC 11550 | protosta-17(20)Z,24-dien-3 $\beta$ -ol | NMR                              | 105       |
| 8   | AfumA        | EDP50814         | <i>Aspergillus fumigatus</i> A1163       | 21 $\beta$ H-hopane-3 $\beta$ ,22-diol | NMR                              | 106       |
| 9   | PolA         | AJ80_03956       | <i>Polytolypa hystricis</i> UAMH7299     | motiol                                 | NMR                              | 107       |

Cyclase information is available at the NCBI database website. <https://www.ncbi.nlm.nih.gov> (NCBI)



**Table S8** Class II sesquiterpene cyclase in fungi

| No. | Cyclase name | Accession number       | Strain                          | Main product           | Structural identification method | Reference |
|-----|--------------|------------------------|---------------------------------|------------------------|----------------------------------|-----------|
| 1   | AstC         | AO090026000582 (AspGD) | <i>Aspergillus oryzae</i> RIB40 | drimanyl pyrophosphate | NMR                              | 108       |
| 2   | DrtB         | A0A0U5GNT1             | <i>Aspergillus calidoustus</i>  | drimenol               | NMR                              | 109       |

Cyclase information is available at the following database websites, and the unlabeled cyclase accession numbers above are NCBI database sources.

<https://www.ncbi.nlm.nih.gov> (NCBI), <http://www.aspgd.org/> (AspGD)

**Table S9** UbiA-type sesquiterpene cyclase in fungi

| No. | Cyclase name | Accession number | Strain                                        | Main product                                                    | Structural identification method | Reference |
|-----|--------------|------------------|-----------------------------------------------|-----------------------------------------------------------------|----------------------------------|-----------|
| 1   | FmaTC        | AGI05042         | <i>Aspergillus fumigatus</i> Af293            | (-)- $\beta$ - <i>trans</i> -bergamotene                        | NMR                              | 110       |
| 2   | StaTC5       | OM891479         | <i>Stachybotrys</i> sp. PYH05-7               | (-)- $\beta$ - <i>trans</i> -bergamotene                        | NMR                              | 111       |
| 3   | BC-TC        | CCD48294         | <i>Botryotonia cinerea</i>                    | (-)- $\beta$ - <i>trans</i> -bergamotene                        | NMR                              | 112       |
| 4   | mFmaA        | EXU98497         | <i>Metarhizium robertsii</i> ARSEF 2575       | (-)- $\beta$ - <i>trans</i> -bergamotene                        | GC-MS                            | 113       |
| 5   | FusTC1       | OM891474         | <i>Fusarium</i> sp. JNU-XJ070152-01           | (-)- $\alpha$ -bisabolol, (-)- <i>epi</i> - $\alpha$ -bisabolol | NMR                              | 111       |
| 6   | StaTC1       | OM891475         | <i>Stachybotrys</i> sp. PYH05-7               | (-)- $\alpha$ -bisabolol                                        | NMR                              | 111       |
| 7   | MyrTC3       | OM891490         | <i>Myrothecium</i> sp. ZL0801-19              | (-)- <i>epi</i> - $\alpha$ -bisabolol                           | NMR                              | 111       |
| 8   | StaTC6       | OM891480         | <i>Stachybotrys</i> sp. PYH05-7               | (-)- <i>epi</i> - $\alpha$ -bisabolol                           | NMR                              | 111       |
| 9   | StaTC2       | OM891476         | <i>Stachybotrys</i> sp. PYH05-7               | (-)-4- <i>epi</i> - $\beta$ -bisabolol                          | NMR                              | 111       |
| 10  | TalTC2       | OM891486         | <i>Talaromyces</i> sp. JNU18266-01            | ( <i>E</i> )- $\gamma$ -bisabolene                              | NMR                              | 111       |
| 11  | MyrTC4       | OM891491         | <i>Myrothecium</i> sp. ZL0801-19              | (+)- <i>Z</i> - $\alpha$ -bisabolene                            | NMR                              | 111       |
| 12  | Tps1A        | KAI0942648       | <i>Antrodia cinnamomea</i> s27                | (+)- <i>Z</i> - $\alpha$ -bisabolene                            | NMR                              | 114       |
| 13  | Tps2A        | KAI0928020       | <i>Antrodia cinnamomea</i> s27                | (+)- <i>Z</i> - $\alpha$ -bisabolene                            | NMR                              | 114       |
| 14  | StaTC8       | OM891482         | <i>Stachybotrys</i> sp. PYH05-7               | (-)- $\alpha$ - <i>trans</i> -bergamotene                       | NMR                              | 111       |
| 15  | Tv86-TC      | XP_013952584     | <i>Trichoderma virens</i>                     | (-)- $\alpha$ - <i>trans</i> -bergamotene                       | NMR                              | 112       |
| 16  | StaTC4       | OM891478         | <i>Stachybotrys</i> sp. PYH05-7               | <b>109, 110</b>                                                 | NMR                              | 111       |
| 17  | TalTC1       | OM891485         | <i>Talaromyces</i> sp. JNU18266-01            | <b>109, 110</b>                                                 | NMR                              | 111       |
| 18  | MycTC        | OM891487         | <i>Mycocleptodiscus</i> sp. JNU2018AT0063Y    | <b>109, 110</b>                                                 | NMR                              | 111       |
| 19  | TriTC        | PTB76894         | <i>Trichoderma longibrachiatum</i> ATCC 18648 | <b>109, 110</b>                                                 | NMR                              | 111       |
| 20  | WesTC        | XP_033655798     | <i>Westerdykella ornata</i>                   | <b>109, 110</b>                                                 | NMR                              | 111       |

Cyclase information is available at the NCBI database website. <https://www.ncbi.nlm.nih.gov> (NCBI)

**Table S10** UbiA-type diterpene cyclase in fungi

| No. | Cyclase name | Accession number | Strain                    | Main product      | Structural identification method | Reference |
|-----|--------------|------------------|---------------------------|-------------------|----------------------------------|-----------|
| 1   | EriG         | KY683782         | <i>Hericium erinaceum</i> | cyatha-3,12-diene | NMR                              | 115       |
| 2   | CyaTC        | KY683786         | <i>Cyathus africanus</i>  | cyatha-3,12-diene | NMR                              | 115       |
| 3   | DenTC3       | KAA1470692       | <i>Dentipellis</i> sp.    | cyatha-3,12-diene | GC-MS, standard                  | 65        |

Cyclase information is available at the NCBI database website. <https://www.ncbi.nlm.nih.gov> (NCBI)

## Supplementary Figures

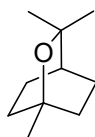

1,8-cineole

**Fig. S1** Structure of class I monoterpene cyclase products

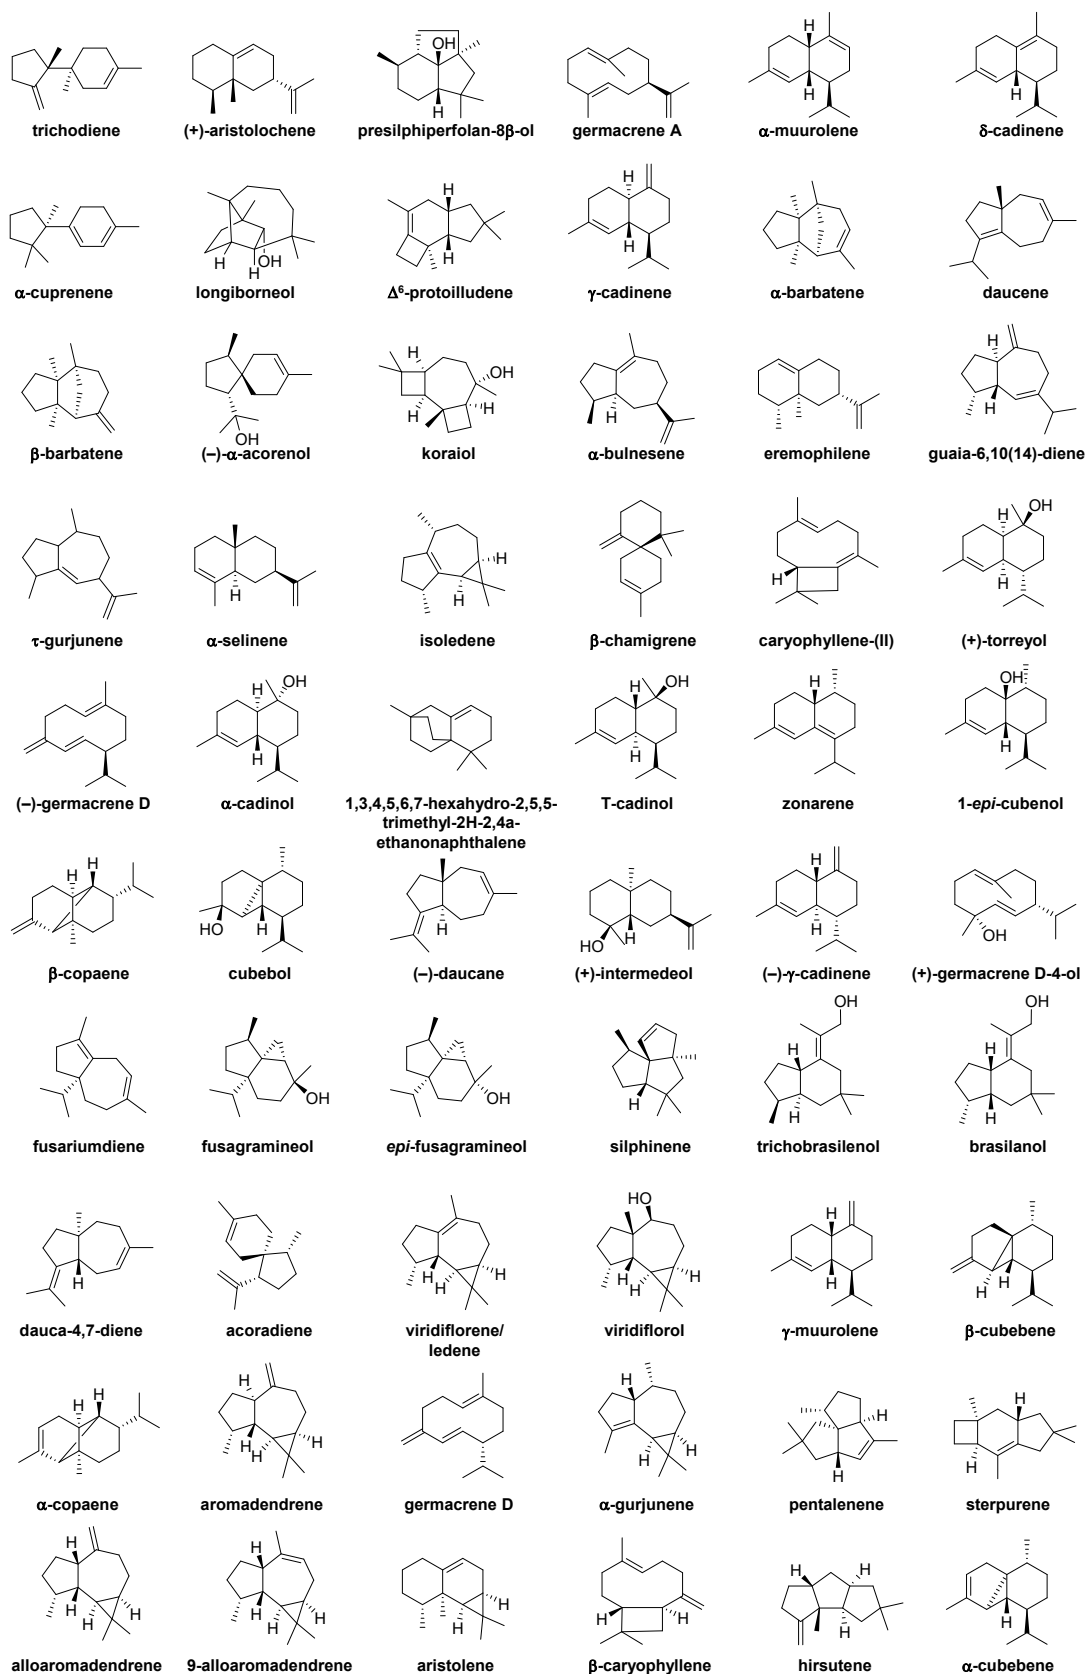

**Fig. S2** Structure of class I sesquiterpene cyclase products

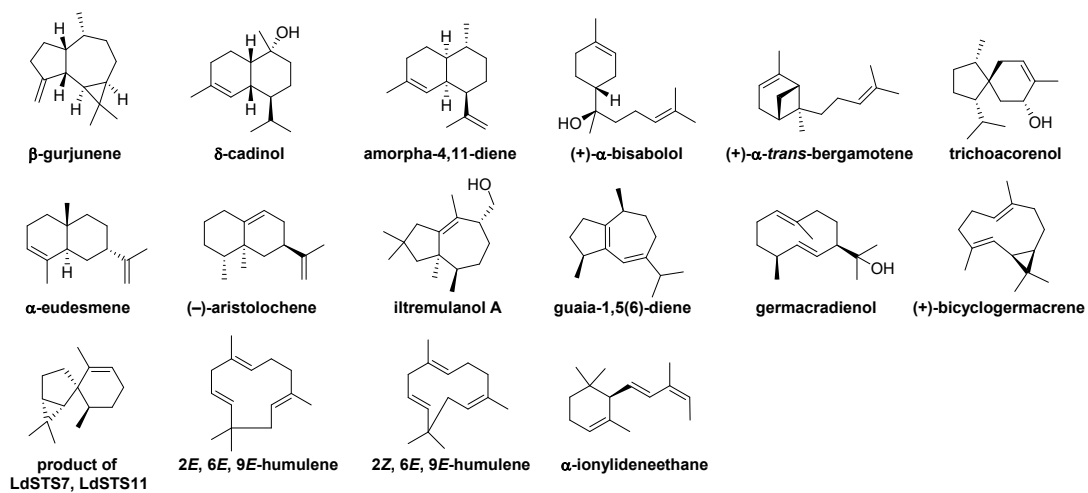

**Fig. S2** Structure of class I sesquiterpene cyclase products (continued)

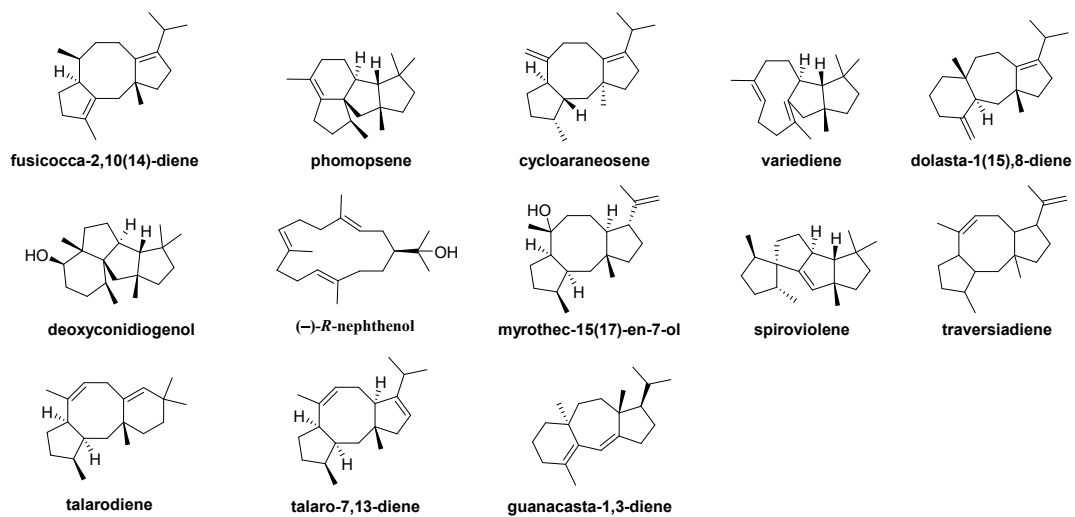

**Fig. S3** Structure of class I diterpene cyclase products

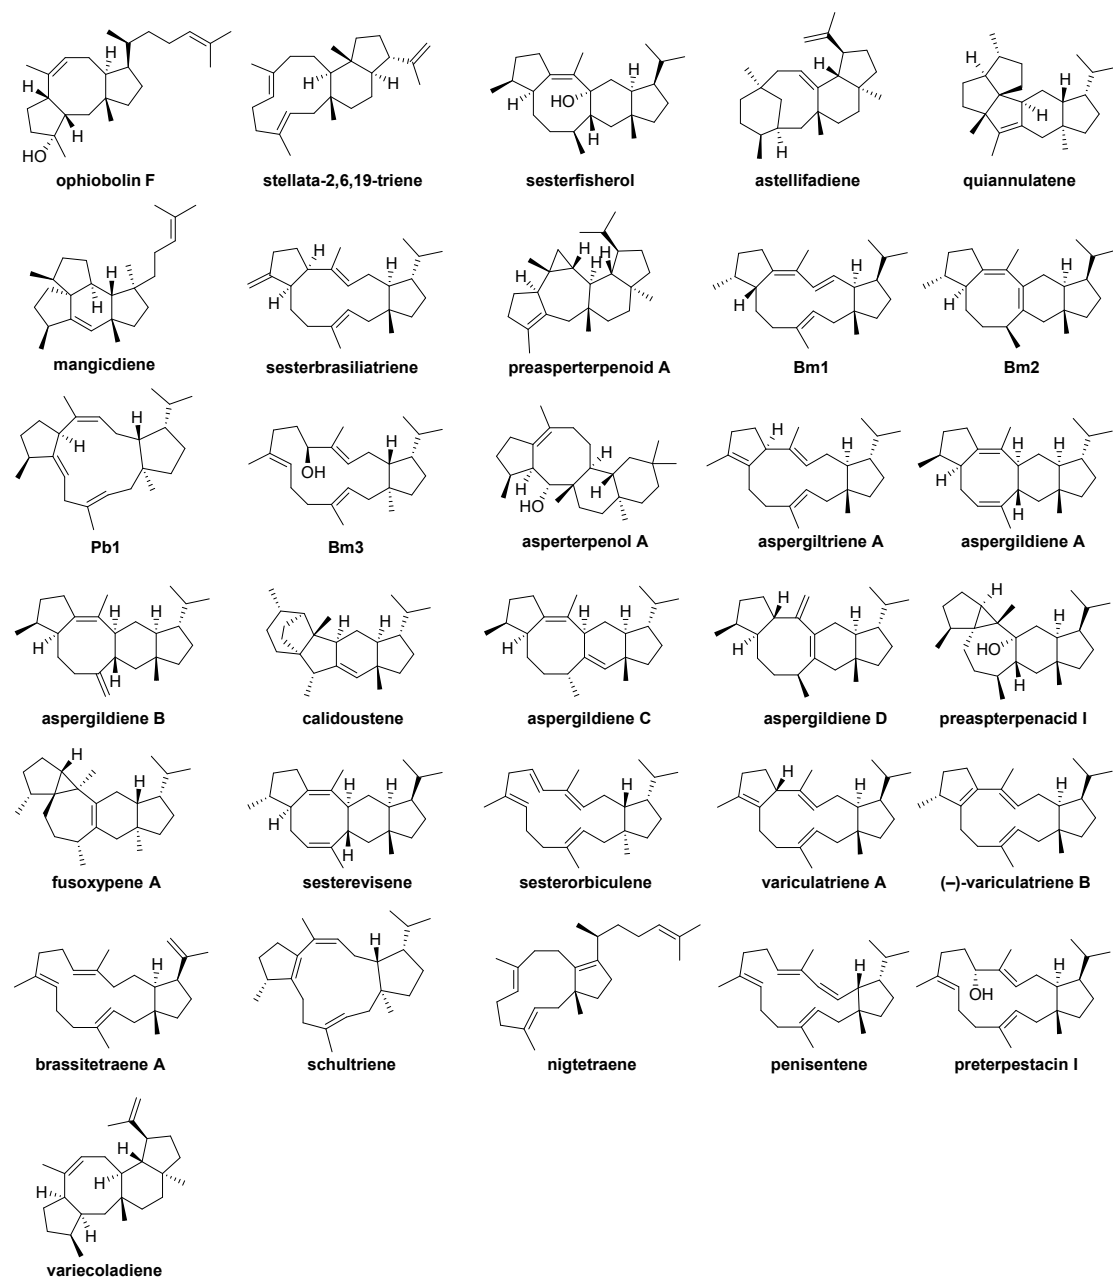

**Fig. S4** Structure of class I sesterterpene cyclase products



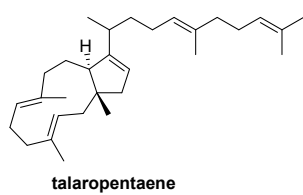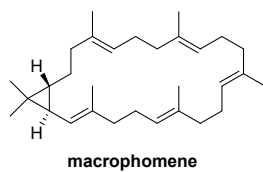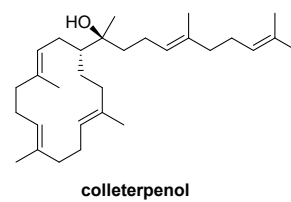

**Fig. S5** Structure of class I triterpene cyclase products

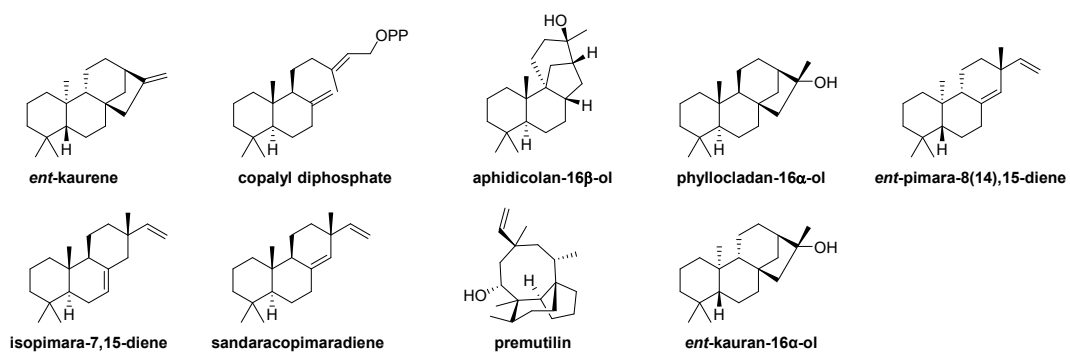

**Fig. S6** Structure of class II diterpene cyclase products

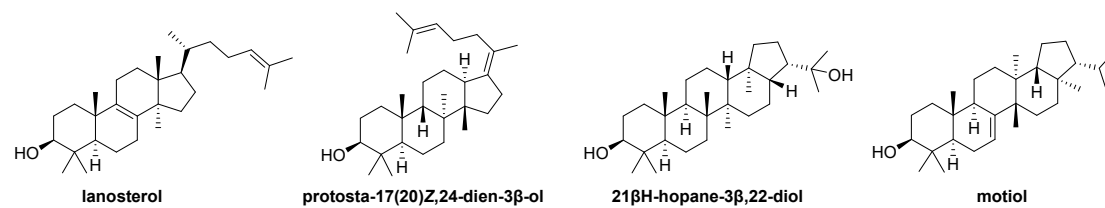

**Fig. S7** Structure of class II triterpene cyclase products

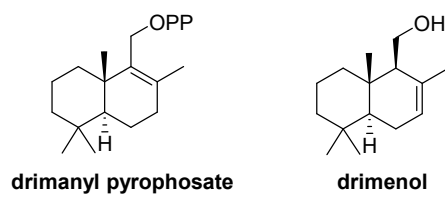

**Fig. S8** Structure of class II sesquiterpene cyclase products

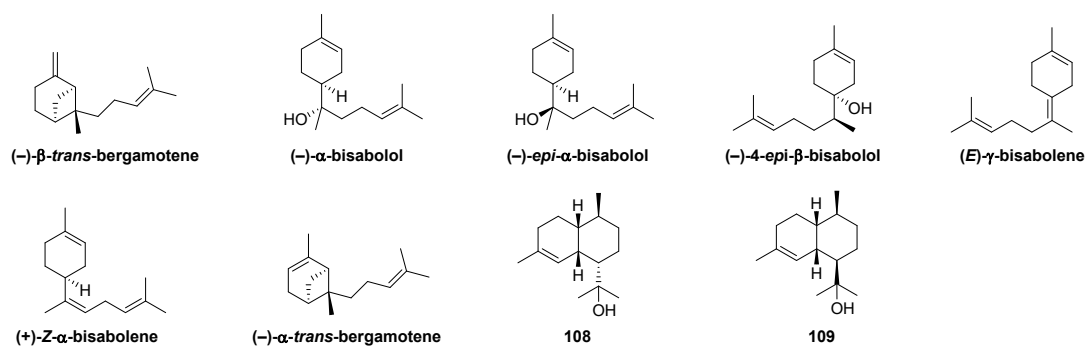

**Fig. S9** Structure of UbiA-type sesquiterpene cyclase products

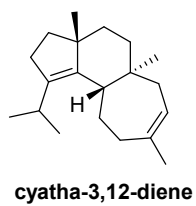

**Fig. S10** Structure of UbiA-type diterpene cyclase products

## Supplementary References

1. J. J. Shaw, T. Berbasova, T. Sasaki, K. Jefferson-George, D. J. Spakowicz, B. F. Dunican, C. E. Portero, A. Narvaez-Trujillo and S. A. Strobel, Identification of a fungal 1,8-cineole synthase from *Hypoxylon* sp. with specificity determinants in common with the plant synthases, *J. Biol. Chem.*, 2015, **290**, 8511–8526.
2. M. H. Thomas and D. B. Phillip, Isolation and nucleotide sequence of a sesquiterpene cyclase gene from the trichothecene-producing fungus *Fusarium sporotrichioides*, *Gene*, 1989, **79**, 131–138.
3. T. M. H. and R. D. P., Purification and characterization of the sesquiterpene cyclase aristolochene synthase from *Penicillium roqueforti*, *Arch. Biochem. Biophys.*, 1989, **272**, 137–143.
4. D. E. Cane and I. Kang, Aristolochene synthase: Purification, molecular cloning, high-level expression in *Escherichia coli*, and characterization of the *Aspergillus terreus* cyclase, *Arch. Biochem. Biophys.*, 2000, **376**, 354–364.
5. Z.-Y. Huang, Q.-Y. Wu, C.-X. Li, H.-L. Yu and J.-H. Xu, Facile production of (+)-aristolochene and (+)-bicyclogermacrene in *Escherichia coli* using newly discovered sesquiterpene synthases from *Penicillium expansum*, *J Agr. Food Chem.*, 2022, **70**, 5860–5868.
6. C. Pinedo, C. M. Wang, J. M. Pradier, B. Dalmais, M. Choquer, P. Le Pêcheur, G. Morgant, I. G. Collado, D. E. Cane and M. Viaud, Sesquiterpene synthase from the botrydial biosynthetic gene cluster of the phytopathogen *Botrytis cinerea*, *ACS Chem. Biol.*, 2008, **3**, 791–801.
7. S. Agger, F. Lopez-Gallego and C. Schmidt-Dannert, Diversity of sesquiterpene synthases in the basidiomycete *Coprinus cinereus*, *Mol. Microbiol.*, 2009, **72**, 1181–1195.
8. G. T. Wawrzyn, M. B. Quin, S. Choudhary, F. López-Gallego and C. Schmidt-Dannert, Draft genome of *Omphalotus olearius* provides a predictive framework for sesquiterpenoid natural product biosynthesis in Basidiomycota, *Chem. Biol.*, 2012, **19**, 772–783.
9. H. Ichinose and T. Kitaoka, Insight into metabolic diversity of the brown-rot basidiomycete *Postia placenta* responsible for sesquiterpene biosynthesis: Semi-comprehensive screening of cytochrome P450 monooxygenase involved in protoilludene metabolism, *Microb. Biotechnol.*, 2018, **11**, 952–965.
10. S. Nagamine, C. Liu, J. Nishishita, T. Kozaki, K. Sogahata, Y. Sato, A. Minami, T. Ozaki, C. Schmidtdannert and J. Maruyama, Ascomycete *Aspergillus oryzae* is an efficient expression host for production of basidiomycete terpenes by using genomic DNA sequences, *Appl. Environ. Microb.*, 2019, **85**, e00409-00419.
11. C. Q. Zhang, X. X. Chen, A. Orban, S. Shukal and M. Ruehl, *Agrocybe aegerita* serves as a gateway for identifying sesquiterpene biosynthetic enzymes in higher fungi, *ACS Chem. Biol.*, 2020, **15**, 1268–1277.
12. N. Püth, F. Ersoy, U. Krings and R. G. Berger, Sesquiterpene cyclases from the basidiomycete *Cerrena unicolor*, *Catalysts*, 2021, **11**, 1361.
13. M. B. Quin, C. M. Flynn, G. T. Wawrzyn, S. Choudhary and C. Schmidt-Dannert, Mushroom hunting by using bioinformatics: Application of a predictive framework facilitates the selective identification of sesquiterpene synthases in Basidiomycota, *ChemBioChem*, 2013, **14**, 2480–2491.
14. S. P. McCormick, N. J. Alexander and L. J. Harris, *CLMI* of *Fusarium*

- graminearum* encodes a longiborneol synthase required for culmorin production, *Appl. Environ. Microb.*, 2010, **76**, 136–141.
15. Y. J. Yuan, M. Litzenburger, S. Cheng, G. K. Bian, B. Hu, P. Yan, Y. S. Cai, Z. X. Deng, R. Bernhardt and T. G. Liu, Sesquiterpenoids produced by combining two sesquiterpene cyclases with promiscuous myxobacterial CYP260B1, *ChemBioChem*, 2019, **20**, 677–682.
  16. B. Engels, U. Heinig, T. Grothe, M. Stadler and S. Jennewein, Cloning and characterization of an *Armillaria gallica* cDNA encoding protoilludene synthase, which catalyzes the first committed step in the synthesis of antimicrobial melleolides, *J. Biol. Chem.*, 2011, **286**, 6871–6878.
  17. J. G. Sena Filho, M. B. Quin, D. J. Spakowicz, J. J. Shaw, K. Kucera, B. Dunican, S. A. Strobel and C. Schmidt-Dannert, Genome of *Diaporthe* sp. provides insights into the potential inter-phylum transfer of a fungal sesquiterpenoid biosynthetic pathway, *Fungal Biol.*, 2016, **120**, 1050–1063.
  18. B. Engels, U. Heinig, C. Mcelroy, R. Meusinger, T. Grothe, M. Stadler and S. Jennewein, Isolation of a gene cluster from *Armillaria gallica* for the synthesis of armillyl orsellinate-type sesquiterpenoids, *Appl. Microbiol. Biot.*, 2021, **105**, 211–224.
  19. N. L. Brock, K. Huss, B. Tudzynski and J. S. Dickschat, Genetic dissection of sesquiterpene biosynthesis by *Fusarium fujikuroi*, *ChemBioChem*, 2013, **14**, 311–315.
  20. Y. Yuan, S. Cheng, G. Bian, P. Yan, Z. Ma, W. Dai, R. Chen, S. Fu, H. Huang, H. Chi, Y. Cai, Z. Deng and T. Liu, Efficient exploration of terpenoid biosynthetic gene clusters in filamentous fungi, *Nat. Catal.*, 2022, **5**, 277–287.
  21. I. Burkhardt, T. Siemon, M. Henrot, L. Studt, S. Rösler, B. Tudzynski, M. Christmann and J. S. Dickschat, Mechanistic characterisation of two sesquiterpene cyclases from the plant pathogenic fungus *Fusarium fujikuroi*, *Angew. Chem. Int. Ed.*, 2016, **55**, 8748–8751.
  22. W. H. Wu, W. Tran, C. A. Taatjes, J. Alonso-Gutierrez, T. S. Lee and J. M. Gladden, Rapid discovery and functional characterization of terpene synthases from four endophytic *Xylariaceae*, *PloS One*, 2016, **11**, e0146983.
  23. H. Zhou, Y. L. Yang, J. Zeng, L. X. Zhang, Z. H. Ding and Y. Zeng, Identification and characterization of a  $\delta$ -cadinol synthase potentially involved in the formation of boreovibrins in *Boreostereum vibrans* of Basidiomycota, *Nat. Prod. Bioprospect.*, 2016, **6**, 167–171.
  24. H. Yap, M. J. Muria-Gonzalez, B. H. Kong, K. A. Stubbs, C. S. Tan, S. T. Ng, N. H. Tan, P. S. Solomon, S. Y. Fung and Y. H. Chooi, Heterologous expression of cytotoxic sesquiterpenoids from the medicinal mushroom *Lignosus rhinocerotis* in yeast, *Microb. Cell Fact.*, 2017, **16**, 103.
  25. M. Ringel, N. Dimos, S. Himpich, M. Haack, C. Huber, W. Eisenreich, G. Schenk, B. Loll and T. Brück, Biotechnological potential and initial characterization of two novel sesquiterpene synthases from Basidiomycota *Coniophora puteana* for heterologous production of  $\delta$ -cadinol, *Microb. Cell Fact.*, 2022, **21**, 64.
  26. E.-M. Niehaus, J. Schumacher, I. Burkhardt, P. Rabe, M. Münsterkötter, U. Güldener, C. M. K. Sieber, J. S. Dickschat and B. Tudzynski, The GATA-type transcription factor Csm1 regulates conidiation and secondary metabolism in *Fusarium fujikuroi*, *Front. Microbiol.*, 2017, **8**, 1175.
  27. J. Liu, C. Chen, X. Wan, G. Yao, S. Bao, F. Wang, K. Wang, T. Song, P. Han and H. Jiang, Identification of the sesquiterpene synthase AcTPS1 and high



- production of (-)-germacrene D in metabolically engineered *Saccharomyces cerevisiae*, *Microb. Cell Fact.*, 2022, **21**, 89.
28. Y. L. Lin, L. T. Ma, Y. R. Lee, J. F. Shaw, S. Y. Wang and F. H. Chu, Differential gene expression network in terpenoid synthesis of *Antrodia cinnamomea* in mycelia and fruiting bodies, *J. Agr. Food Chem.*, 2017, **65**, 1874–1886.
  29. W. Mischko, M. Hirte, M. Fuchs, N. Mehlmer and T. B. Brück, Identification of sesquiterpene synthases from the Basidiomycota *Coniophora puteana* for the efficient and highly selective  $\beta$ -copaene and cubebol production in *E. coli*, *Microb. Cell Fact.*, 2018, **17**, 164.
  30. S.-C. Chen, B.-C. Jiang, Y.-J. Lu, C.-H. Chang, T.-H. Wu, S.-W. Lin, H.-W. Yin, T.-H. Lee and C.-H. Hsu, Characterization and crystal structures of a cubebol-producing sesquiterpene synthase from *Antrodia cinnamomea*, *J. Agr. Food Chem.*, 2023, **71**, 13014–13023.
  31. Y. Yan, Q. K. Liu, X. Zang, S. G. Yuan, U. Bat-Erdene, C. Nguyen, J. H. Gan, J. H. Zhou, S. E. Jacobsen and Y. Tang, Resistance-gene-directed discovery of a natural-product herbicide with a new mode of action, *Nature*, 2018, **559**, 415–418.
  32. I. Burkhardt, N. Kreuzenbeck, C. Beemelmans and J. S. Dickschat, Mechanistic characterization of three sesquiterpene synthases from the termite-associated fungus *Termitomyces*, *Org. Biomol. Chem.*, 2019, **17**, 3348–3355.
  33. R. Cao, X. Wu, Q. Wang, P. Qi, Y. Zhang, L. Wang and C. Sun, Characterization of  $\gamma$ -cadinene enzymes in *Ganoderma lucidum* and *Ganoderma sinensis* from basidiomycetes provides insight into the identification of terpenoid synthases, *ACS Omega*, 2022, **7**, 7229–7239.
  34. G. K. Bian, A. W. Hou, Y. Y. Yuan, B. Hu, S. Cheng, Z. L. Ye, Y. T. Di, Z. X. Deng and T. G. Liu, Metabolic engineering-based rapid characterization of a sesquiterpene cyclase and the skeletons of fusariumdiene and fusagramineol from *Fusarium graminearum*, *Org. Lett.*, 2018, **20**, 1626–1629.
  35. H. C. Zeng, G. P. Yin, Q. Wei, D. H. Li, Y. Wang, Y. C. Hu, C. H. Hu and Y. Zou, Unprecedented [5.5.5.6]dioxafenestrane ring construction in fungal insecticidal sesquiterpene biosynthesis, *Angew. Chem. Int. Ed.*, 2019, **58**, 6569–6573.
  36. Q. Wei, H.-C. Zeng and Y. Zou, Divergent biosynthesis of fungal dioxafenestrane sesquiterpenes by the cooperation of distinctive Baeyer–Villiger monooxygenases and  $\alpha$ -ketoglutarate-dependent dioxygenases, *ACS Catal.*, 2021, **11**, 948–957.
  37. K. Murai, L. Lauterbach, K. Teramoto, Z. Y. Quan, L. Barra, T. Yamamoto, K. Nonaka, K. Shiomi, M. Nishiyama and T. Kuzuyama, An unusual skeletal rearrangement in the biosynthesis of the sesquiterpene trichobrasilenol from *Trichoderma*, *Angew. Chem. Int. Ed.*, 2019, **58**, 15046–15050.
  38. J. Feng, F. Surup, M. Hauser, A. Miller, J.-P. Wennrich, M. Stadler, R. J. Cox and E. Kuhnert, Biosynthesis of oxygenated brasilane terpene glycosides involves a promiscuous N-acetylglucosamine transferase, *Chem. Commun.*, 2020, **56**, 12419–12422.
  39. X. Sun, Y. S. Cai, Y. J. Yuan, G. K. Bian, Z. L. Ye, Z. X. Deng and T. G. Liu, Genome mining in *Trichoderma viride* J1-030: Discovery and identification of novel sesquiterpene synthase and its products, *Beilstein J. Org. Chem.*, 2019, **15**, 2052–2058.

40. C. F. Lee, L. X. Chen, C. Y. Chiang, C. Y. Lai and H. C. Lin, The biosynthesis of norsesquiterpene aculenes requires three cytochrome P450 enzymes to catalyze a stepwise demethylation process, *Angew. Chem. Int. Ed.*, 2019, **58**, 18414–18418.
41. D. A. Yee, T. B. Kakule, W. Cheng, M. Chen and Y. Tang, Genome mining of alkaloidal terpenoids from a hybrid terpene and nonribosomal peptide biosynthetic pathway, *J. Am. Chem. Soc.*, 2019, **142**, 710–714.
42. W. Cheng, M. Chen, M. Ohashi and Y. Tang, Biosynthesis of terpenoid–pyrrolobenzoxazine hybrid natural product CJ-12662, *Angew. Chem. Int. Ed.*, 2022, **61**, e202116928.
43. Y.-H. Wen, T.-J. Chen, L.-Y. Jiang, L. Li, M. Guo, Y. Peng, J.-J. Chen, F. Pei, J.-L. Yang, R.-S. Wang, T. Gong and P. Zhu, Unusual (2*R*,6*R*)-bicyclo[3.1.1]heptane ring construction in fungal  $\alpha$ -*trans*-bergamotene biosynthesis, *iScience*, 2022, **25**, 104030.
44. R. Chen, T. Feng, M. Li, X. Zhang, J. He, B. Hu, Z. Deng, T. Liu, J.-K. Liu, X. Wang and G. Bian, Characterization of tremulane sesquiterpene synthase from the basidiomycete *Irpex lacteus*, *Org. Lett.*, 2022, **24**, 5669–5673.
45. J. Liu, X. Guo, X. Guo, B. Zhong, T. Wang, D. Liu, H. Jin, J. Ren, Z. Liu, J. Gao, S.-M. Li, A. Fan and W. Lin, Concise biosynthesis of tropone-containing spiromaterpenes by a sesquiterpene cyclase and a multifunctional P450 from a deep-sea-derived *Spiromastix* sp. fungus, *J. Nat. Prod.*, 2022, **85**, 2723–2730.
46. M. Peter, Y. Yang and S.-M. Li, A terpene cyclase from *Aspergillus ustus* is involved in the biosynthesis of geosmin precursor germacradienol, *RSC Advances*, 2022, **12**, 28171–28177.
47. C. B. Cheong, G. Peh, Y. Wei, R. T. E. L. Ang, H. Zhao, C. Zhang and Y. H. Lim, A spirobicyclo[3.1.0]terpene from the investigation of sesquiterpene synthases from *Lactarius deliciosus*, *ACS Chem. Biol.*, 2023, **18**, 134–140.
48. R. Schor, C. Schotte, D. Wibberg, J. Kalinowski and R. J. Cox, Three previously unrecognised classes of biosynthetic enzymes revealed during the production of xenovulene A, *Nat. Commun.*, 2018, **9**, 1–9.
49. C. Schotte, L. Li, D. Wibberg, J. Kalinowski and R. J. Cox, Synthetic biology driven biosynthesis of unnatural tropolone sesquiterpenoids, *Angew. Chem. Int. Ed.*, 2020, **59**, 23870–23878.
50. Y. Zhai, Y. Li, J. Zhang, Y. Zhang, F. Ren, X. Zhang, G. Liu, X. Liu and Y. Che, Identification of the gene cluster for bistropolone-humulene meroterpenoid biosynthesis in *Phoma* sp., *Fungal Genet. Biol.*, 2019, **129**, 7–15.
51. Q. Chen, J. Gao, C. Jamieson, J. Liu and Y. Hu, Enzymatic intermolecular hetero-Diels–Alder reaction in the biosynthesis of tropolonic sesquiterpenes, *J. Am. Chem. Soc.*, 2019, **141**, 14052–14056.
52. J. Takino, T. Kozaki, Y. Sato, C. Liu, T. Ozaki, A. Minami and H. Oikawa, Unveiling biosynthesis of the phytohormone abscisic acid in fungi: Unprecedented mechanism of core scaffold formation catalyzed by an unusual sesquiterpene synthase, *J. Am. Chem. Soc.*, 2018, **140**, 12392–12395.
53. T. Toyomasu, M. Tsukahara, A. Kaneko, R. Niida, W. Mitsuhashi, T. Dairi, N. Kato and T. Sassa, Fusicoccins are biosynthesized by an unusual chimera diterpene synthase in fungi, *PNAS*, 2007, **104**, 3084–3088.
54. A. Minami, N. Tajima, Y. Higuchi, T. Toyomasu, T. Sassa, N. Kato and T. Dairi, Identification and functional analysis of brassicene C biosynthetic gene cluster in *Alternaria brassicicola*, *Bioorg. Med. Chem. Lett.*, 2009, **19**,

- 870–874.
55. A. Tazawa, Y. Ye, T. Ozaki, C. Liu, Y. Ogasawara, T. Dairi, Y. Higuchi, N. Kato, K. Gomi, A. Minami and H. Oikawa, Total biosynthesis of brassicicenones: Identification of a key enzyme for skeletal diversification, *Org. Lett.*, 2018, **20**, 6178–6182.
  56. R. Chen, Q. D. Jia, X. Mu, B. Hu, X. Sun, Z. X. Deng, F. Chen, G. K. Bian and T. G. Liu, Systematic mining of fungal chimeric terpene synthases using an efficient precursor-providing yeast chassis, *PNAS*, 2021, **118**, e2023247118.
  57. T. Toyomasu, A. Kaneko, T. Tokiwano, Y. Kanno, Y. Kanno, R. Niida, S. Miura, T. Nishioka, C. Ikeda and W. Mitsuhashi, Biosynthetic gene-based secondary metabolite screening: A new diterpene, methyl phomopsenonate, from the fungus *Phomopsis amygdali*, *J. Org. Chem.*, 2009, **74**, 1541–1548.
  58. F. Kudo, Y. Matsuura, T. Hayashi, M. Fukushima and T. Eguchi, Genome mining of the sordarin biosynthetic gene cluster from *Sordaria araneosa* Cain ATCC 36386: Characterization of cycloaraneosene synthase and GDP-6-deoxyaltrose transferase, *J. Antibiot.*, 2016, **69**, 541–548.
  59. B. Qin, Y. Matsuda, T. Mori, M. Okada, Z. Y. Quan, T. Mitsuhashi, T. Wakimoto and I. Abe, An unusual chimeric diterpene synthase from *Emericella varicolor* and its functional conversion into a sesterterpene synthase by domain swapping, *Angew. Chem. Int. Ed.*, 2016, **55**, 1658–1661.
  60. G. K. Bian, Y. C. Han, A. W. Hou, Y. J. Yuan, X. H. Liu, Z. X. Deng and T. G. Liu, Releasing the potential power of terpene synthases by a robust precursor supply platform, *Metab. Eng.*, 2017, **42**, 1–8.
  61. J. Rinkel, S. T. Steiner, G. K. Bian, R. Chen, T. G. Liu and J. S. Dickschat, A family of related fungal and bacterial di- and sesterterpenes: Studies on fusaterpenol and variediene, *ChemBioChem*, 2020, **21**, 486–491.
  62. G. K. Bian, J. Rinkel, Z. Q. Wang, L. Lauterbach, A. W. Hou, Y. J. Yuan, Z. X. Deng, T. G. Liu and J. S. Dickschat, A clade II-D fungal chimeric diterpene synthase from *Colletotrichum gloeosporioides* produces dolasta-1(15),8-diene, *Angew. Chem. Int. Ed.*, 2018, **57**, 15887–15890.
  63. T. Mitsuhashi, T. Kikuchi, S. Hoshino, M. Ozeki, T. Awakawa, S. P. Shi, M. Fujita and I. Abe, Crystalline sponge method enabled the investigation of a prenyltransferase-terpene synthase chimeric enzyme, whose product exhibits broadened NMR signals, *Org. Lett.*, 2018, **20**, 5606–5609.
  64. T. Shiina, K. Nakagawa, Y. Fujisaki, T. Ozaki, C. Liu, T. Toyomasu, M. Hashimoto, H. Koshino, A. Minami and H. Kawaide, Biosynthetic study of conidiation-inducing factor conidiogenone: Heterologous production and cyclization mechanism of a key bifunctional diterpene synthase, *Biosci. Biotech., Bioch.*, 2018, **83**, 192–201.
  65. X.-L. Li, Y.-X. Xu, Y. Li, R. Zhang, T.-Y. Hu, P. Su, M. Zhou, T. Tang, Y. Zeng, Y.-L. Yang and W. Gao, Rapid discovery and functional characterization of diterpene synthases from basidiomycete fungi by genome mining, *Fungal Genet. Biol.*, 2019, **128**, 36–42.
  66. F. L. Lin, L. Lauterbach, J. Zou, Y. H. Wang, J. M. Lv, G. D. Chen, D. Hu, H. Gao, X. S. Yao and J. S. Dickschat, Mechanistic characterization of the fusicoccane-type diterpene synthase for myrothec-15(17)-en-7-ol, *ACS Catal.*, 2020, **10**, 4306–4312.
  67. P. Zhang, G. Wu, S. C. Heard, C. Niu, S. A. Bell, F. Li, Y. Ye, Y. Zhang and J. M. Winter, Identification and characterization of a cryptic bifunctional type I diterpene synthase involved in talaronoid biosynthesis from a marine-derived

- fungus, *Org. Lett.*, 2022, **24**, 7037–7041.
68. J.-H. Huang, J.-M. Lv, L.-Y. Xiao, Q. Xu, F.-L. Lin, G.-Q. Wang, G.-D. Chen, S.-Y. Qin, D. Hu and H. Gao, Characterization of a new fusicoccane-type diterpene synthase and an associated P450 enzyme, *Beilstein J. Org. Chem.*, 2022, **18**, 1396–1402.
  69. J. He, J.-X. Du, Q.-R. Zhao, Y.-P. Liu, Y.-L. Yang, J.-K. Liu and T. Feng, Biochemical and genetic basis of guanacastane diterpene biosynthesis in basidiomycete fungi, *Org. Lett.*, 2023, **25**, 5345–5349.
  70. R. Chiba, A. Minami, K. Gomi and H. Oikawa, Identification of ophiobolin F synthase by a genome mining approach: A sesterterpene synthase from *Aspergillus clavatus*, *Org. Lett.*, 2013, **15**, 594–597.
  71. Y. Matsuda, T. Mitsuhashi, Z. Y. Quan and I. Abe, Molecular basis for stellatic acid biosynthesis: A genome mining approach for discovery of sesterterpene synthases, *Org. Lett.*, 2015, **17**, 4644–4647.
  72. Y. Ye, A. Minami, A. Mandi, C. W. Liu, T. Taniguchi, T. Kuzuyama, K. Monde, K. Gomi and H. Oikawa, Genome mining for sesterterpenes using bifunctional terpene synthases reveals a unified intermediate of di/sesterterpenes, *J. Am. Chem. Soc.*, 2015, **137**, 11846–11853.
  73. D. Li, M. Yang, R. Mu, S. Luo, Y. Chen, W. Li, A. Wang, K. Guo, Y. Liu and S. Li, Characterization of two chimeric sesterterpene synthases from a fungal symbiont isolated from a sesterterpenoid-producing Lamiaceae plant *Leucosceptrum canum*, *Chinese Chem. Lett.*, 2023, **34**, 107469.
  74. Y. Matsuda, T. Mitsuhashi, S. K. Lee, M. Hoshino, T. Mori, M. Okada, H. P. Zhang, F. Hayashi, M. Fujita and I. Abe, Astellifadiene: Structure determination by NMR spectroscopy and crystalline sponge method, and elucidation of its biosynthesis, *Angew. Chem. Int. Ed.*, 2016, **55**, 5785–5788.
  75. M. Okada, Y. Matsuda, T. Mitsuhashi, S. Hoshino, T. Mori, K. Nakagawa, Z. Y. Quan, B. Qin, H. P. Zhang and F. Hayashi, Genome-based discovery of an unprecedented cyclization mode in fungal sesterterpenoid biosynthesis, *J. Am. Chem. Soc.*, 2016, **138**, 10011–10018.
  76. T. Mitsuhashi, J. Rinkel, M. Okada, I. Abe and J. S. Dickschat, Mechanistic characterization of two chimeric sesterterpene synthases from *Penicillium*, *Chem–Eur. J.*, 2017, **23**, 10053–10057.
  77. J. H. Huang, J. M. Lv, Q. Z. Wang, J. Zou, Y. J. Lu, Q. L. Wang, D. N. Chen, X. S. Yao, H. Gao and D. Hu, Biosynthesis of an anti-tuberculosis sesterterpenoid asperterpenoid A, *Org. Biomol. Chem.*, 2019, **17**, 248–251.
  78. K. Narita, H. Sato, A. Minami, K. Kudo, L. Gao, C. W. Liu, T. Ozaki, M. Kodama, X. G. Lei and T. Taniguchi, Focused genome mining of structurally related sesterterpenes: Enzymatic formation of enantiomeric and diastereomeric products, *Org. Lett.*, 2017, **19**, 6696–6699.
  79. L. Gao, K. Narita, T. Ozaki, N. Kumakura, P. Gan, A. Minami, C. W. Liu, X. G. Lei, K. Shirasu and H. Oikawa, Identification of novel sesterterpenes by genome mining of phytopathogenic fungi *Phoma* and *Colletotrichum* sp., *Tetrahedron Lett.*, 2018, **59**, 1136–1139.
  80. L. Jiang, G. Zhu, J. Han, C. Hou, X. Zhang, Z. Wang, W. Yuan, K. Lv, Z. Cong and X. Wang, Genome-guided investigation of anti-inflammatory sesterterpenoids with 5-15 *trans*-fused ring system from phytopathogenic fungi, *Appl. Microbiol. Biot.*, 2021, **105**, 5407–5417.
  81. Z. Y. Quan and J. S. Dickschat, Biosynthetic gene cluster for asperterpenols A and B and the cyclization mechanism of asperterpenol A synthase, *Org. Lett.*,

- 2020, **22**, 7552–7555.
82. J. J. Guo, Y. S. Cai, F. C. Cheng, C. J. Yang, W. Q. Zhang, W. L. Yu, J. J. Yan, Z. X. Deng and K. Hong, Genome mining reveals a multiproduct sesterterpenoid biosynthetic gene cluster in *Aspergillus ustus*, *Org. Lett.*, 2021, **23**, 1525–1529.
  83. Z. Quan, A. Hou, B. Goldfuss and J. S. Dickschat, Mechanism of the bifunctional multiple product sesterterpene synthase AcAS from *Aspergillus calidoustus*, *Angew. Chem. Int. Ed.*, 2022, **61**, e202117273.
  84. L. Jiang, X. Zhang, Y. Sato, G. L. Zhu, A. Minami, W. Y. Zhang, T. Ozaki, B. Zhu, Z. X. Wang, X. Y. Wang, K. J. Lv, J. Y. Zhang, Y. H. Wang, S. S. Gao, C. W. Liu, T. Hsiang, L. X. Zhang, H. Oikawa and X. T. Liu, Genome-based discovery of enantiomeric pentacyclic sesterterpenes catalyzed by fungal bifunctional terpene synthases, *Org. Lett.*, 2021, **23**, 4645–4650.
  85. L. Jiang, H. Yang, X. Zhang, X. Li, K. Lv, W. Zhang, G. Zhu, C. Liu, Y. Wang, T. Hsiang, L. Zhang and X. Liu, Schultriene and nigetraene: Two sesterterpenes characterized from pathogenetic fungi via genome mining approach, *Appl. Microbiol. Biot.*, 2022, **106**, 6047–6057.
  86. Y. Qiao, Q. Xu, Z. Huang, X. Chen, X. Ren, W. Yuan, Z. Guan, P. Li, F. Li, C. Xiong, H. Zhu, C. Chen, L. Gu, Y. Zhou, C. Qi, Z. Hu, J. Liu, Y. Ye and Y. Zhang, Genome mining reveals a new cyclopentane-forming sesterterpene synthase with unprecedented stereo-control, *Org. Chem. Front.*, 2022, **9**, 5808–5818.
  87. D. Yan, J. Arakelyan, T. Wan, R. Raina, T. K. Chan, D. Ahn, V. Kushnarev, T. K. Cheung, H. C. Chan, I. Choi, P. Y. Ho, F. Hu, Y. Kim, H. L. Lau, Y. L. Law, C. S. Leung, C. Y. Tong, K. K. Wong, W. L. Yim, N. S. Karnaukhov, R. Y. C. Kong, M. V. Babak and Y. Matsuda, Genomics-driven derivatization of the bioactive fungal sesterterpenoid variecolin: Creation of an unnatural analogue with improved anticancer properties, *Acta Pharm. Sin. B*, 2023, DOI: <https://doi.org/10.1016/j.apsb>.
  88. H. Tao, L. Lauterbach, G. Bian, R. Chen, A. Hou, T. Mori, S. Cheng, B. Hu, L. Lu, X. Mu, M. Li, N. Adachi, M. Kawasaki, T. Moriya, T. Senda, X. Wang, Z. Deng, I. Abe, J. S. Dickschat and T. Liu, Discovery of non-squalene triterpenes, *Nature*, 2022, **606**, 414–419.
  89. H. Kawaide, R. Imai, T. Sassa and Y. Kamiya, *ent*-Kaurene synthase from the fungus *Phaeosphaeria* sp. L487, *J. Biol. Chem.*, 1997, **272**, 21706–21712.
  90. T. Toyomasu, H. Kawaide, A. Ishizaki, S. Shinoda, M. Otsuka, W. Mitsuhashi and T. Sassa, Cloning of a full-length cDNA encoding *ent*-kaurene synthase from *Gibberella fujikuroi*: Functional analysis of a bifunctional diterpene cyclase, *Biosci., Biotech., Bioch.*, 2000, **64**, 660–664.
  91. B. Tudzynski, H. Kawaide and Y. Kamiya, Gibberellin biosynthesis in *Gibberella fujikuroi*: Cloning and characterization of the copalyl diphosphate synthase gene, *Curr. Genet.*, 1998, **34**, 234–240.
  92. T. Toyomasu, R. Niida, H. Kenmoku, Y. Kanno, S. Miura, C. Nakano, Y. Shiono, W. Mitsuhashi, H. Tushima, H. Oikawa, T. Hoshino, T. Dairi, N. Kato and T. Sassa, Identification of diterpene biosynthetic gene clusters and functional analysis of labdane-related diterpene cyclases in *Phomopsis amygdali*, *Biosci., Biotech., Bioch.*, 2008, **72**, 1038–1047.
  93. T. Mitsuhashi, M. Okada and I. Abe, Identification of chimeric  $\alpha\beta\gamma$  diterpene synthases possessing both type II terpene cyclase and prenyltransferase activities, *ChemBioChem*, 2017, **18**, 2104–2109.

94. H. Oikawa, T. Toyomasu, H. Toshima, S. Ohashi, H. Kawaide, Y. Kamiya, M. Ohtsuka, S. Shinoda, W. Mitsuhashi and T. Sassa, Cloning and functional expression of cDNA encoding aphidicolan-16 $\beta$ -ol synthase: A key enzyme responsible for formation of an unusual diterpene skeleton in biosynthesis of aphidicolin, *J. Am. Chem. Soc.*, 2001, **123**, 5154–5155.
95. K. Bromann, M. Toivari, K. Viljanen, L. Ruohonen and T. Nakarisetala, Engineering *Aspergillus nidulans* for heterologous *ent*-kaurene and gamma-terpinene production, *Appl. Microbiol. Biot.*, 2016, **100**, 6345–6359.
96. M. Xu, M. L. Hillwig, M. S. Tiernan and R. J. Peters, Probing labdane-related diterpenoid biosynthesis in the fungal genus *Aspergillus*, *J. Nat. Prod.*, 2017, **80**, 328–333.
97. M. Yamane, A. Minami, C. W. Liu, T. Ozaki, I. Takeuchi, T. Tsukagoshi, T. Tokiwano, K. Gomi and H. Oikawa, Biosynthetic machinery of diterpene pleuromutilin isolated from basidiomycete fungi, *ChemBioChem*, 2017, **18**, 2317–2322.
98. E. J. Corey, S. P. T. Matsuda and B. Bartelt, Molecular cloning, characterization, and overexpression of ERG7, the *Saccharomyces cerevisiae* gene encoding lanosterol synthase, *PNAS*, 1994, **91**, 2211–2215.
99. Z. Shi, C. J. Buntel and J. H. Griffin, Isolation and characterization of the gene encoding 2,3-oxidosqualene-lanosterol cyclase from *Saccharomyces cerevisiae*, *PNAS*, 1994, **91**, 7370–7374.
100. C.-H. Shang, L. Shi, A. Ren, L. Qin and M.-W. Zhao, Molecular cloning, characterization, and differential expression of a lanosterol synthase Gene from *Ganoderma lucidum*, *Biosci., Biotech., Bioch.*, 2014, **74**, 974–978.
101. Y.-L. Lin, Y.-R. Lee, N.-W. Tsao, S.-Y. Wang, J.-F. Shaw and F.-H. Chu, Characterization of the 2,3-oxidosqualene cyclase gene from *Antrodia cinnamomea* and enhancement of cytotoxic triterpenoid compound production, *J. Nat. Prod.*, 2015, **78**, 1556–1562.
102. J. M. Lv, D. Hu, H. Gao, T. Kushiro, T. Awakawa, G. D. Chen, C. X. Wang, I. Abe and X. S. Yao, Biosynthesis of helvolic acid and identification of an unusual C-4-demethylation process distinct from sterol biosynthesis, *Nat. Commun.*, 2017, **8**, 1644.
103. G.-H. An, J.-G. Han, H.-S. Park, G.-H. Sung and O.-T. Kim, Identification of an oxidosqualene cyclase gene involved in steroidal triterpenoid biosynthesis in *Cordyceps farinosa*, *Genes*, 2021, **12**, 848.
104. Z. Cao, S. Li, J. Lv, H. Gao, G. Chen, T. Awakawa, I. Abe, X. Yao and D. Hu, Biosynthesis of clinically used antibiotic fusidic acid and identification of two short-chain dehydrogenase/reductases with converse stereoselectivity, *Acta Pharm. Sin. B*, 2019, **9**, 433–442.
105. Z.-Q. Cao, J.-M. Lv, Q. Liu, S.-Y. Qin, G.-D. Chen, P. Dai, Y. Zhong, H. Gao, X.-S. Yao and D. Hu, Biosynthetic study of cephalosporin P1 reveals a multifunctional P450 enzyme and a site-selective acetyltransferase, *ACS Chem. Biol.*, 2019, **15**, 44–51.
106. K. Ma, P. Zhang, Q. Tao, N. P. Keller, Y. Yang, W.-B. Yin and H. Liu, Characterization and biosynthesis of a rare fungal hopane-type triterpenoid glycoside involved in the antistress property of *Aspergillus fumigatus*, *Org. Lett.*, 2019, **21**, 3252–3256.
107. X.-Y. Li, J.-M. Lv, Z.-Q. Cao, G.-Q. Wang, F.-L. Lin, G.-D. Chen, S.-Y. Qin, D. Hu, H. Gao and X.-S. Yao, Biosynthetic characterization of the antifungal fernane-type triterpenoid polytolypin for generation of new analogues via

- combinatorial biosynthesis, *Org. Biomol. Chem.*, 2023, **21**, 851–857.
108. Y. Shinohara, S. Takahashi, H. Osada and Y. Koyama, Identification of a novel sesquiterpene biosynthetic machinery involved in astellolide biosynthesis, *Sci. Rep.*, 2016, **6**, 1–11.
  109. Y. Huang, S. Hoefgen and V. Valiante, Biosynthesis of fungal drimane-type sesquiterpene esters, *Angew. Chem. Int. Ed.*, 2021, **60**, 2–10.
  110. H. C. Lin, Y. H. Chooi, S. Dhingra, W. Xu, A. M. Calvo and Y. Tang, The fumagillin biosynthetic gene cluster in *Aspergillus fumigatus* encodes a cryptic terpene cyclase involved in the formation of  $\beta$ -trans-bergamotene, *J. Am Chem. Soc.*, 2013, **135**, 4616–4619.
  111. P. Luo, J.-M. Lv, Y.-F. Xie, L.-Y. Xiao, S.-Y. Qin, G.-D. Chen, X.-Z. Luo, D. Hu and H. Gao, Discovery and characterization of a novel sub-group of UbiA-type terpene cyclases with a distinct motif I, *Org. Chem. Front.*, 2022, **9**, 3057–3060.
  112. M.-C. Tang, C. Shen, Z. Deng, M. Ohashi and Y. Tang, Combinatorial biosynthesis of terpenoids through mixing-and-matching sesquiterpene cyclase and cytochrome P450 pairs, *Org. Lett.*, 2022, **24**, 4783–4787.
  113. Y. Sun, B. Chen, X. Li, Y. Yin and C. Wang, Orchestrated biosynthesis of the secondary metabolite cocktails enables the producing fungus to combat diverse bacteria, *mBio*, 2022, **13**, e01800–01822.
  114. R. T. Hewage, C. C. Tseng, S. Y. Liang, C. Y. Lai and H. C. Lin, Genome mining of cryptic bisabolenes that were biosynthesized by intramembrane terpene synthases from *Antrodia cinnamomea*, *Phil. Trans. R. Soc. B*, 2023, **378**, 20220033.
  115. Y. L. Yang, S. S. Zhang, K. Ma, Y. X. Xu, Q. Q. Tao, Y. H. Chen, J. C. Chen, S. X. Guo, J. W. Ren and W. K. Wang, Discovery and characterization of a new family of diterpene cyclases in bacteria and fungi, *Angew. Chem. Int. Ed.*, 2017, **56**, 4749–4752.
